# Supplementary material for: High Density Polyethylenes Bearing Isolated In-Chain Carbonyls
Source: Research Square preprint supplement (doi:10.21203/rs.3.rs-769212/v1), 2021-08-10
Supplement: Supplementary file 1 [file 9f88c5857e3353ede687b47d.pdf]

## *Supplementary Information*

# **High Density Polyethylenes Bearing Isolated In-Chain Carbonyls**

Shan Tang,<sup>†</sup> Falk William Seidel,<sup>†</sup> Kyoko Nozaki\*

Department of Chemistry and Biotechnology, Graduate School of Engineering, The University of Tokyo, 7-3-1- Hongo, Bunkyo-ku, Tokyo 113-8656 (Japan); <sup>†</sup>These authors contributed equally:

Shan Tang, Falk William Seidel. \*Email: nozaki@chembio.t.u-tokyo.ac.jp

|                                                           |            |
|-----------------------------------------------------------|------------|
| <b>General information.....</b>                           | <b>S2</b>  |
| <b>Experimental procedures.....</b>                       | <b>S3</b>  |
| <b>X-ray crystallographic analysis for [Pd]-1-CO.....</b> | <b>S10</b> |
| <b>Proposed mechanism for CO transfer.....</b>            | <b>S12</b> |
| <b>Photodegradation experiment.....</b>                   | <b>S14</b> |
| <b>Copies of NMR spectra.....</b>                         | <b>S15</b> |
| <b>Copies of SEC charts .....</b>                         | <b>S30</b> |
| <b>References.....</b>                                    | <b>S47</b> |

## General information

All reactions were carried out in an argon filled glove box or using standard Schlenk techniques under nitrogen. All copolymerizations were performed in a 50-mL stainless steel autoclave. Ethylene (>99.9%) was purchased from Takachiho Chemical Industrial Co., Ltd. (Takachiho), and dried, by passing through a dry column DC-HDF300-A3 made by Nikka Seiko Co., Ltd. Dppp (>98.0%) and dppb (>98.0%) were purchased from TCI and opened and stored in an argon filled glovebox. PdMeCl(cod)<sup>1</sup>, [Pd]-1,<sup>2</sup> [Pd]-2,<sup>2</sup> [Pd]-3,<sup>2</sup> [Pd]-4,<sup>2</sup> [Pd]-5,<sup>3</sup> and [Pd]-6<sup>4</sup> was prepared according to literature procedures. Anhydrous toluene was purchased from Kanto Chemical Co. Inc. (Kanto) and purified by the method of Pangborn et al. Anhydrous PhCF<sub>3</sub> was purchased from Aldrich and used as is in an argon filled glovebox. NMR spectra were recorded on a BRUKER Ascend 500 (<sup>1</sup>H: 500 MHz, <sup>13</sup>C: 126 MHz) NMR spectrometer at ambient temperature unless otherwise noted. Chemical shift values for protons are referenced to the residual proton resonance of 1,1,2,2-tetrachloroethane-*d*<sub>2</sub> (C<sub>2</sub>D<sub>2</sub>Cl<sub>4</sub>,  $\delta$ : 6.00) or HFIP (9:1 C<sub>3</sub>H<sub>2</sub>F<sub>6</sub>O /C<sub>6</sub>D<sub>6</sub>,  $\delta$ : 4.26; referenced to TMS). Chemical shift values for carbons are referenced to the carbon resonances of CDCl<sub>3</sub> ( $\delta$ : 77.2 ppm), 1,1,2,2-tetrachloroethane ( $\delta$ : 74.0 ppm) or HFIP (9:1 C<sub>3</sub>H<sub>2</sub>F<sub>6</sub>O/C<sub>6</sub>D<sub>6</sub>,  $\delta$ : 71.57 ppm; referenced to TMS). <sup>1</sup>H NMR analyses of polymers were performed in a 5-mm probe on ca. 5 wt % solutions of the polymers C<sub>2</sub>D<sub>2</sub>Cl<sub>4</sub> at 120 °C using a 30° pulse of 50.0  $\mu$ s, a spectral width of 10 kHz, a relaxation time of 5.0 s, an acquisition time of 3.2 s (BRUKER Ascend500). Quantitative <sup>13</sup>C NMR analyses of polymers were performed on ca. 15 weight% solutions of the polymers and ca. 0.05 M Cr(acac)<sub>3</sub> as a relaxation agent in 1,1,2,2-tetrachloroethane unlocked at 120 °C using a 30° pulse of 16.8  $\mu$ s, a spectral width of 30 kHz, a relaxation time of 2 s, an acquisition time = 1.1 s, and inverse-gated decoupling (BRUKER Ascend500). NMR assignments were assisted by <sup>13</sup>C-DEPT, <sup>1</sup>H-<sup>13</sup>C HSQC, and <sup>1</sup>H-<sup>13</sup>C HMBC data. Size exclusion chromatography (SEC) analyses were carried out with a Tosoh instrument (HLC-8321GPC/HT) equipped with two SEC columns (Tosoh TSKgel GMHHR- H(S)HT) and a refractive index (RI) detector by eluting the columns with 1,2-dichlorobenzene at 1.0 mL/min at 140 °C. Molecular weights were determined using narrow polystyrene standards and were corrected for polyethylene by universal calibration using the Mark-Houwink parameters of Rudin *et al.*:  $K = 1.75 \times 10^{-2} \text{ cm}^3/\text{g}$  and  $\alpha = 0.67$  for polystyrene and  $K = 5.90 \times 10^{-2} \text{ cm}^3/\text{g}$  and  $\alpha = 0.69$  for LLDPE. Differential scanning calorimetry (DSC) measurements of polymers were performed on a Seiko DSC 7020 analyzer at a heating and cooling rate of 20 °C/min. Thermogravimetric (TG) analyses were performed on a Seiko EXSTAR 6000 TG/DTA 6200 analyzer at a heating rate of 10 °C/min.

## Experimental procedures

**A representative procedure for copolymerization of ethylene and metal carbonyls (Table 1, entry 1):** A 50 mL stainless steel autoclave along with a 40 mL glass tube were dried in an oven at 120 °C, and then allowed to cool inside a glovebox. The glass tube was charged with [Pd]-1 (10 μmol), toluene (10.0 mL), Fe<sub>2</sub>(CO)<sub>9</sub> (0.25 mmol) and then placed in the autoclave. The autoclave was then sealed, charged with ethylene (3.0 MPa) and stirred in an isothermal heating block at 80 °C for 3 h. After cooling the autoclave to room temperature, the excess gas pressure was carefully vented in a well ventilated fumehood. The reaction was quenched by addition of methanol (ca. 80 mL). The formed precipitate was filtered, and washed with diluted hydrochloric acid and methanol. The obtained solid was dried under vacuum for 4 hours at 100 °C. The molecular weight and polydispersity were determined by size exclusion chromatography. CO incorporation ratio (i. r.) in mol% from the <sup>1</sup>H NMR spectra by the integration of the signals for isolated ketone unit (**B**, 2.42 ppm), alternating copolymer unit (**H**, 2.70 ppm; **F**, 2.46 ppm; **B** = **F**) and those not adjacent to carbonyl groups. Assuming that there is no accumulating alternating ketone unit due to low CO incorporation, Isolated carbonyls/Alternating carbonyls (I/A) = (**B**+**F**-**H**)/2**H**, CO i. r. (%) = (**B**+**F**+**H**)/(a+c+d+e+f+g+h+j+n+i+b+k+m+o+p+q+C+G+2**B**+2**F**+2**H**)×100%. CO incorporation ratio (i. r.) can also be calculated from the quantitative <sup>13</sup>C{<sup>1</sup>H} NMR spectra by the integration of the signals for carbonyl groups and those not adjacent to carbonyl groups, CO i.r. (%) = (**A**+**E**)/(a+c+d+e+f+g+h+j+n+i+b+k+m+o+p+q+C+G+**B**+**F**+**H**+2**A**+2**E**)×100%.

**Experimental procedure for copolymerization of ethylene with Fe<sub>2</sub>(CO)<sub>9</sub> outside the reaction mixture (Table 1, entry 5):** A 50 mL stainless steel autoclave along with a 40 mL glass tube were dried in an oven at 120 °C, and then allowed to cool inside a glovebox. Fe<sub>2</sub>(CO)<sub>9</sub> (0.25 mmol) and toluene (1.0 mL) were added to the autoclave. Meanwhile, the glass tube was charged with [Pd]-1 (10 μmol), toluene (10.0 mL) and then placed in the autoclave. The autoclave was then sealed, charged with ethylene (3.0 MPa) and stirred in an isothermal heating block at 80 °C for 3 h. After cooling the autoclave to room temperature, the excess gas pressure was carefully vented in a well ventilated fumehood. The reaction was quenched by addition of methanol (ca. 80 mL). The formed precipitate was filtered, and washed with diluted hydrochloric acid and methanol. The obtained solid was dried under vacuum for 4 hours at 100 °C. The molecular weight and polydispersity were determined by size exclusion chromatography. CO i. r. and I/A selectivity were determined by <sup>1</sup>H NMR analysis.

**Experimental procedure for copolymerization of ethylene with low pressure CO (Table 1, entry 6):** A 50 mL stainless steel autoclave along with a 40 mL glass tube were dried in an oven at 120 °C, and then allowed to cool inside a glovebox. The glass tube was charged with [Pd]-1 (10 μmol), toluene (10.0 mL) and then placed in the autoclave. The autoclave was then sealed, charged with ethylene/CO feed (5.0 MPa, 10:1), released to atmosphere pressure, and finally charged with ethylene (3.0 MPa). The autoclave was stirred in an isothermal heating block at 80 °C for 3 h. After cooling the autoclave to room temperature, the excess gas pressure was carefully vented in a well ventilated fumehood. The reaction was quenched by addition of methanol (ca. 80 mL). The formed precipitate was filtered, and washed with diluted hydrochloric acid and methanol. The obtained solid was dried under vacuum for 4 hours at 100 °C. The molecular weight and polydispersity were

determined by size exclusion chromatography. CO i. r. and I/A selectivity were determined by  $^1\text{H}$  NMR analysis.

**Experimental procedure for the attempted polymerization reactions with the dppp and dppb ligands:** In an argon filled glovebox was prepared a mixture of dppp (41.2 mg, 0.10 mmol) or dppb (42.6 mg, 0.10 mmol) and  $\text{PdMeCl}(\text{cod})$  (26.5 mg, 100  $\mu\text{mol}$ ),  $\text{NaBAR}_4^{\text{F}}$  (88.6 mg, 0.10 mmol), 2,6-lutidine (11.6  $\mu\text{L}$ ; 0.10 mmol) in anhydrous  $\text{PhCF}_3$  (total volume 10.00 mL). The mixture was vigorously stirred at room temperature for 1 h, and then filtered through a syringe filter to remove some insolubles. The obtained clear, colorless stock solution (10  $\mu\text{mol/mL}$ ) of the catalyst was used within 1 d and stored in a freezer at  $-35\text{ }^\circ\text{C}$  in between use. In an argon filled glovebox was charged an inert glass tube containing a strong stir bar with 1.0 mL of the respective catalyst stock solution (10 mmol), followed by 9.0 mL of dry toluene. For the polymerization experiments with  $\text{Fe}_2(\text{CO})_9$ , the tube was at this point additionally charged with solid  $\text{Fe}_2(\text{CO})_9$  (90.9 mg, 0.25 mmol). The tube was placed in an autoclave, the autoclave was closed with wrenches and transferred out of the glovebox. The autoclave was then pressurized while vigorously stirring with 3.0 MPa ethylene for 2 min. The autoclave was stirred in an isothermal heating block at  $80\text{ }^\circ\text{C}$  for 3 h. After cooling the autoclaves to room temperature, the excess gas pressure was carefully vented in a well ventilated fumehood. The reaction was quenched by addition of methanol (ca. 80 mL). No precipitate was observed both with dppp or dppb.

**Stoichiometric experiment on carbonyl transfer from  $\text{Fe}_2(\text{CO})_9$  to catalyst [Pd]-1 to generate [Pd]-1-CO:** In an argon filled glovebox were added [Pd]-1 (10.0 mg; 15.9  $\mu\text{mol}$ ),  $\text{Fe}_2(\text{CO})_9$  (56.8 mg; 0.16 mmol) and dry  $\text{CD}_2\text{Cl}_2$  (0.60 mL) to a J. Young NMR tube to give a gold-brownish suspension. After standing at room temperature for 1 h some conversion to [Pd]-1-CO was observed by  $^{31}\text{P}\{^1\text{H}\}$ -NMR. Since  $\text{Fe}_2(\text{CO})_9$  has a poor solubility, ultrasonication was used occasionally during the reaction process. After 24 h, the sample was filtered in an argon filled glovebox through a pad of Celite (ca. 1cm) in a syringe equipped with a PTFE filter to remove dark solids.  $^{31}\text{P}\{^1\text{H}\}/^1\text{H}$  analysis of the clear green filtrate at this stage indicated clean conversion to [Pd]-1-CO (Supplementary Fig. 1 and 2). The solution gradually showed signs of decomposition over the next two days. The sample was then layered with hexanes in an argon filled glovebox and placed in a freezer ( $-35\text{ }^\circ\text{C}$ ) for crystallization, which gave some poor-quality crystals that by preliminary scXRD analysis were identical to the reference sample of [Pd]-1-CO.

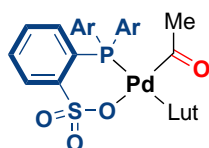

**Synthesis of reference complex [Pd]-1-CO:** A 10 mL J. Young Schlenk containing a stir bar was charged in an argon filled glovebox with [Pd]-1 (20.0 mg; 0.032 mol) and dry  $\text{CD}_2\text{Cl}_2$  (2.1 mL) to give a colorless solution. The Schlenk was closed and brought out of the glovebox and connected via a three-way valve to a nitrogen Schlenk manifold and a CO gas balloon (Valve closed towards the CO balloon during the degassing step; *Careful:* Extremely toxic gas, only work with appropriate PPE and a CO and  $\text{O}_2$  gas sensor in a well ventilated fumehood; a buddy system with a coworker that keeps watch is advised when working with CO). The reaction mixture was freeze-pump-thawed trice with liquid nitrogen, then the CO gas balloon was connected to the reaction vessel via valve

manipulation. The reaction mixture was allowed to stir for 19 h at room temperature, after which NMR analysis of the reaction mixture showed full conversion to the target compound. The Schlenk was then closed, transferred into an argon filled glovebox. After filtering the reaction mixture through a GF/B plug in a pipet to remove some dark particles (presumably Pd black) into a vial, the colorless filtrate was carefully layered with dry n-hexane (8 mL) and allowed to stand at room temperature for crystallization. After 19 h the supernatant was decanted, and the remaining crystalline solids were washed with dry n-hexane (2 x 1.0 mL) and dried in HV for 9 h to give the product as a pale colored solid (FW ( $M + (CD_2Cl_2)_{0.1}$ ) = 666.70 g/mol; 15.5 mg; 23.2  $\mu$ mol; 73% yield).  $^1H$  NMR (500 MHz,  $CD_2Cl_2$ )  $\delta$  7.97 (ddd,  $J$  = 7.8, 5.0, 1.4 Hz, 1H), 7.87 (s, 2H), 7.64 (t,  $J$  = 7.7 Hz, 1H), 7.56 (tdd,  $J$  = 8.3, 1.7, 0.9 Hz, 2H), 7.45 – 7.36 (m, 2H), 7.32 – 7.26 (m, 1H), 7.19 (d,  $J$  = 7.7 Hz, 2H), 7.09 (tt,  $J$  = 7.6, 1.4 Hz, 2H), 6.97 (ddd,  $J$  = 8.3, 4.6, 1.0 Hz, 2H), 3.66 (s, 6H), 3.33 (s, 6H), 1.56 (d,  $J$  = 0.9 Hz, 3H).  $^{13}C$  NMR (126 MHz,  $CD_2Cl_2$ )  $\delta$  225.17 (d,  $J$  = 4.2 Hz, Pd-(CO)-Me), 161.10 (d,  $J$  = 1.8 Hz), 159.87, 148.74 (d,  $J$  = 15.6 Hz), 139.07, 138.02, 135.12 (d,  $J$  = 2.2 Hz), 133.71, 130.43 (d,  $J$  = 2.4 Hz), 128.06 (dd,  $J$  = 118.8, 7.8 Hz), 127.50 (d,  $J$  = 48.9 Hz), 123.08 (d,  $J$  = 2.3 Hz), 121.09 (d,  $J$  = 12.1 Hz), 116.05 (d,  $J$  = 53.2 Hz), 111.37 (d,  $J$  = 4.1 Hz), 55.26, 35.41 (d,  $J$  = 21.4 Hz), 26.24.  $^{31}P$  NMR (202 MHz,  $CD_2Cl_2$ )  $\delta$  8.16. Analysis (% calcd, % found for  $C_{29}H_{30}NO_6PPdS \cdot (CD_2Cl_2)_{0.1}$ : C (52.33, 52.07), N (2.10, 2.15), H content was not determined due to co-crystallized  $CD_2Cl_2$  which contains deuterium. Elemental analysis indicates that ca. 0.1 eq co-crystallized  $CD_2Cl_2$  remains in the bulk sample after the drying step;  $CD_2Cl_2$  was observed to co-crystallize with the target compound according to the single crystal XRD analysis. Some colorless X-ray quality crystals were taken from the bulk sample before the drying step, which decreased the isolated yield.

FS1077pre.2.fid  
FS1077pre 31P[1H]

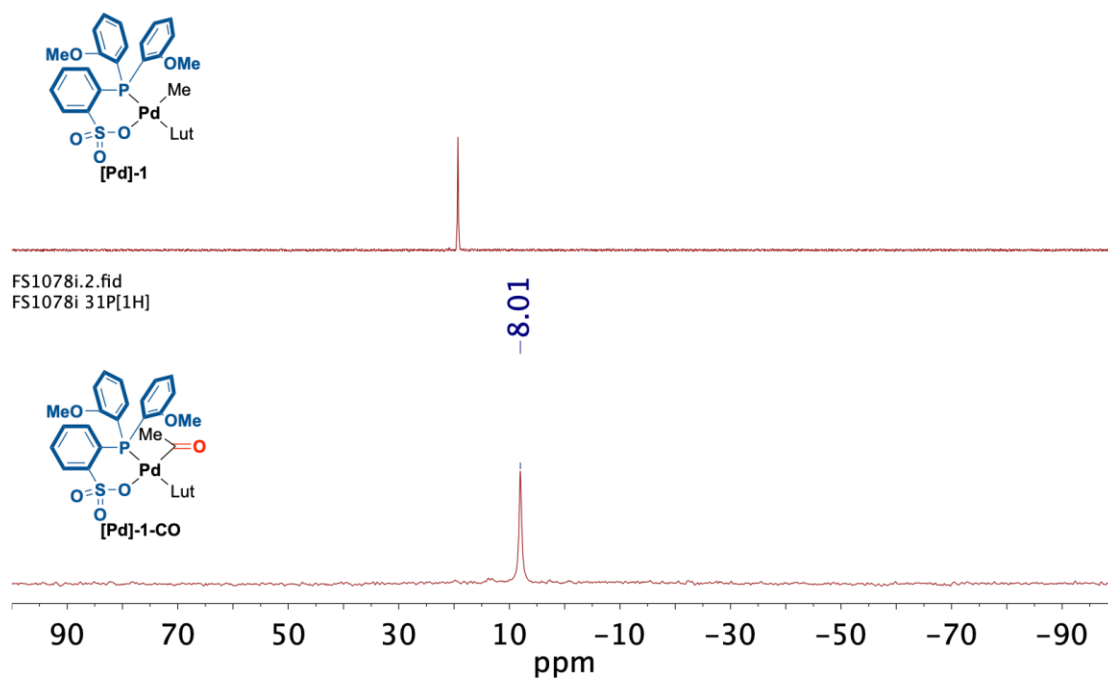

**Supplementary Figure 1.**  $^{31}\text{P}[^1\text{H}]$  NMR spectrum of **[Pd]-1-CO** obtained from the NMR experiment ( $\text{CD}_2\text{Cl}_2$ , 202 MHz, 25°C).

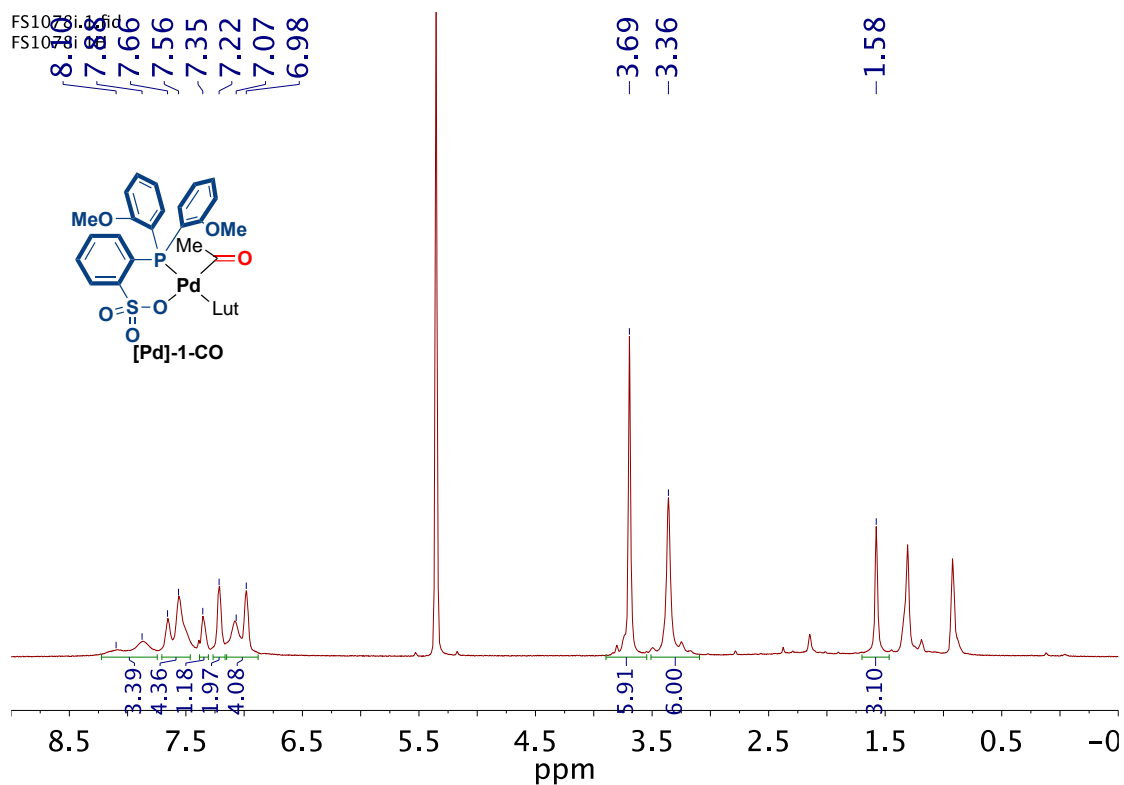

**Supplementary Figure 2.**  $^1\text{H}$  NMR spectrum of **[Pd]-1-CO** obtained from the NMR experiment ( $\text{CD}_2\text{Cl}_2$ , 500 MHz, 25°C).

FS1098h.2.fid  
FS1098h 31P[1H]

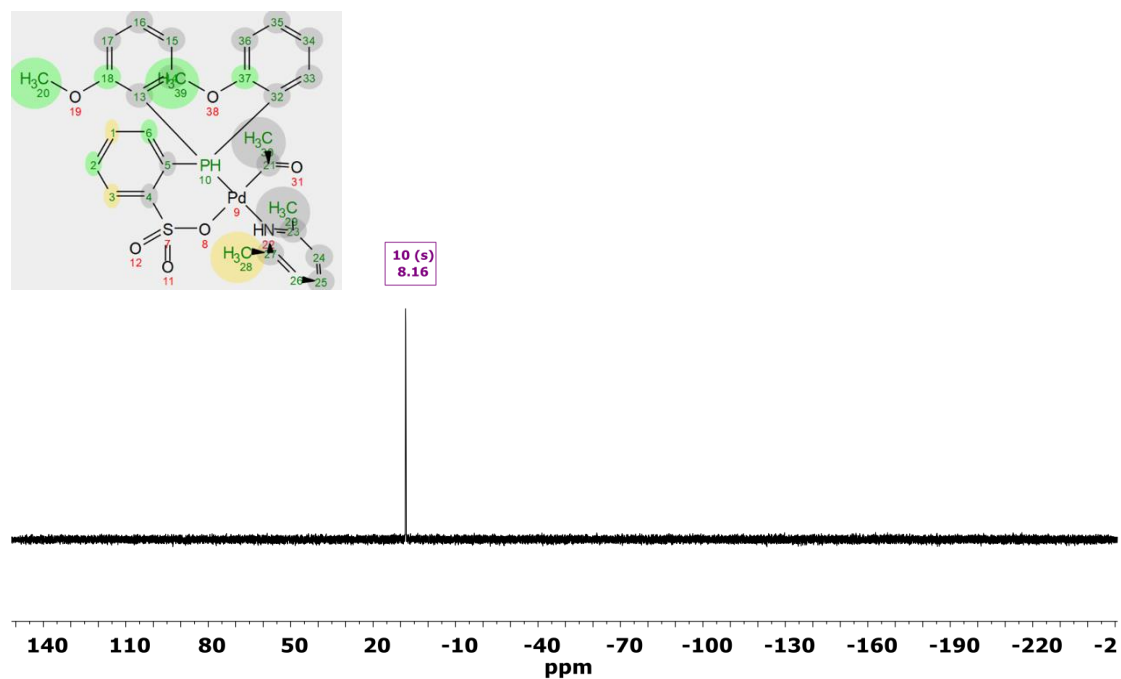

**Supplementary Figure 3.**  $^{31}\text{P}$ [ $^1\text{H}$ ] NMR spectrum of reference compound [Pd]-1-CO ( $\text{CD}_2\text{Cl}_2$ , 202 MHz, 25°C).

FS1098h.1.fid  
FS1098h 1H

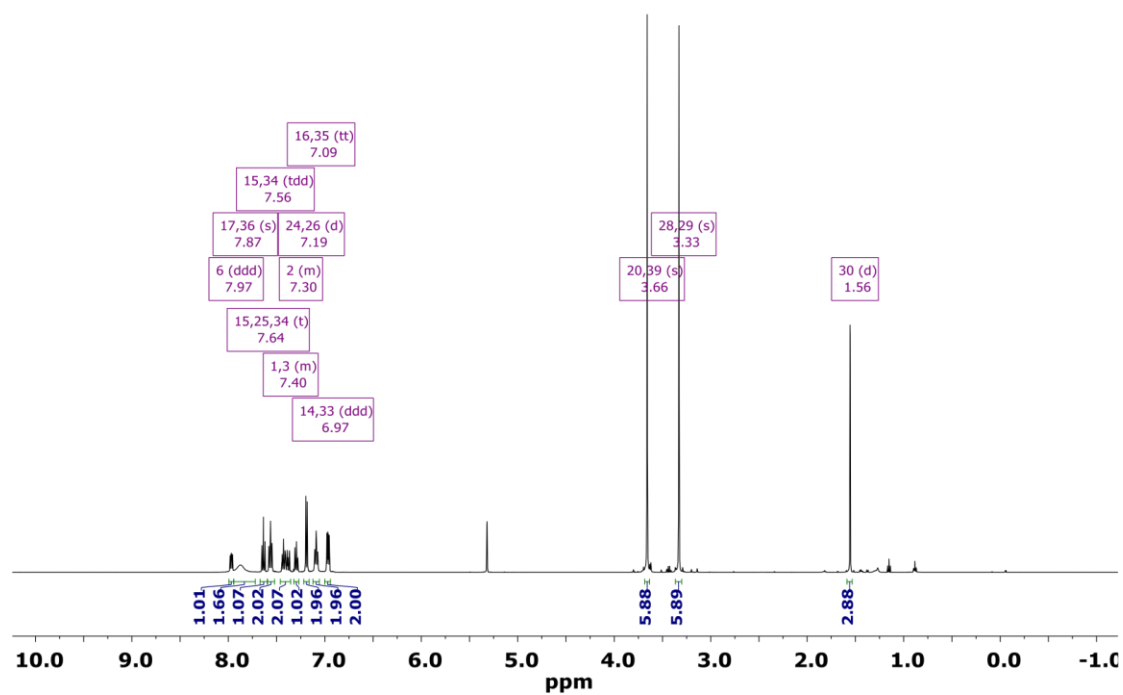

**Supplementary Figure 4.**  $^1\text{H}$  NMR spectrum of reference compound [Pd]-1-CO ( $\text{CD}_2\text{Cl}_2$ , 500 MHz, 25°C).

FS1098h.3.fid  
FS1098h 13C{1H}

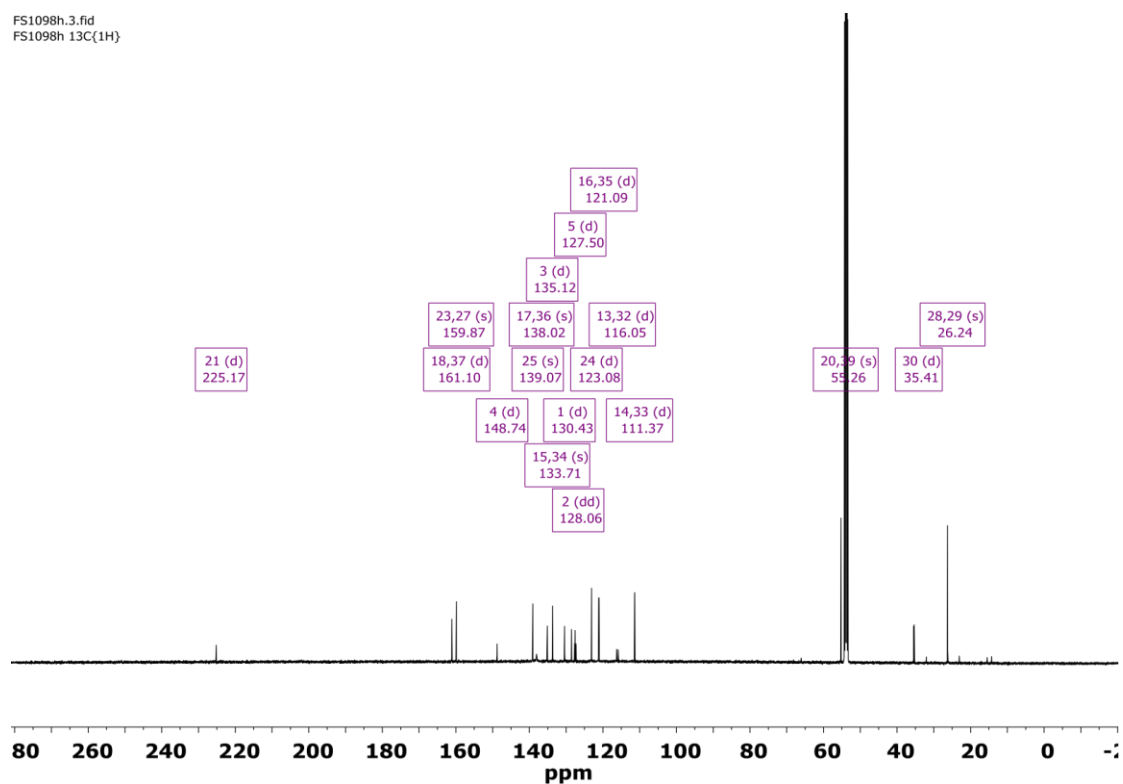

**Supplementary Figure 5.**  $^{13}\text{C}\{^1\text{H}\}$  NMR spectrum of reference compound **[Pd]-1-CO** ( $\text{CD}_2\text{Cl}_2$ , 126 MHz, 25°C).

FS1098h.3.fid  
FS1098h 13C{1H}

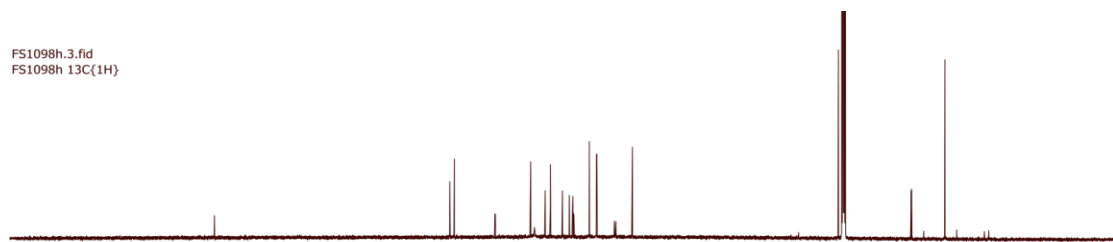

FS1098h.6.fid  
FS1098h DEPT90

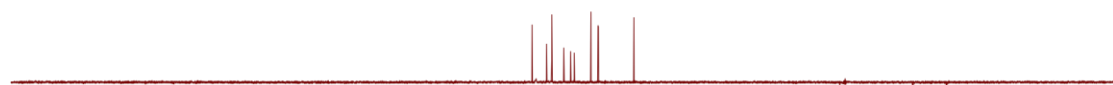

FS1098h.7.fid  
FS1098h DEPT135

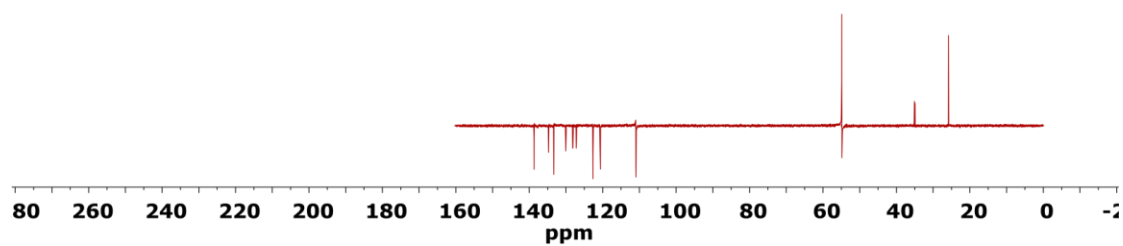

**Supplementary Figure 6.** Stacked  $^{13}\text{C}\{^1\text{H}\}$  (top), DEPT90 (middle) and DEPT135 (bottom) spectra of reference compound **[Pd]-1-CO** ( $\text{CD}_2\text{Cl}_2$ , 25°C).



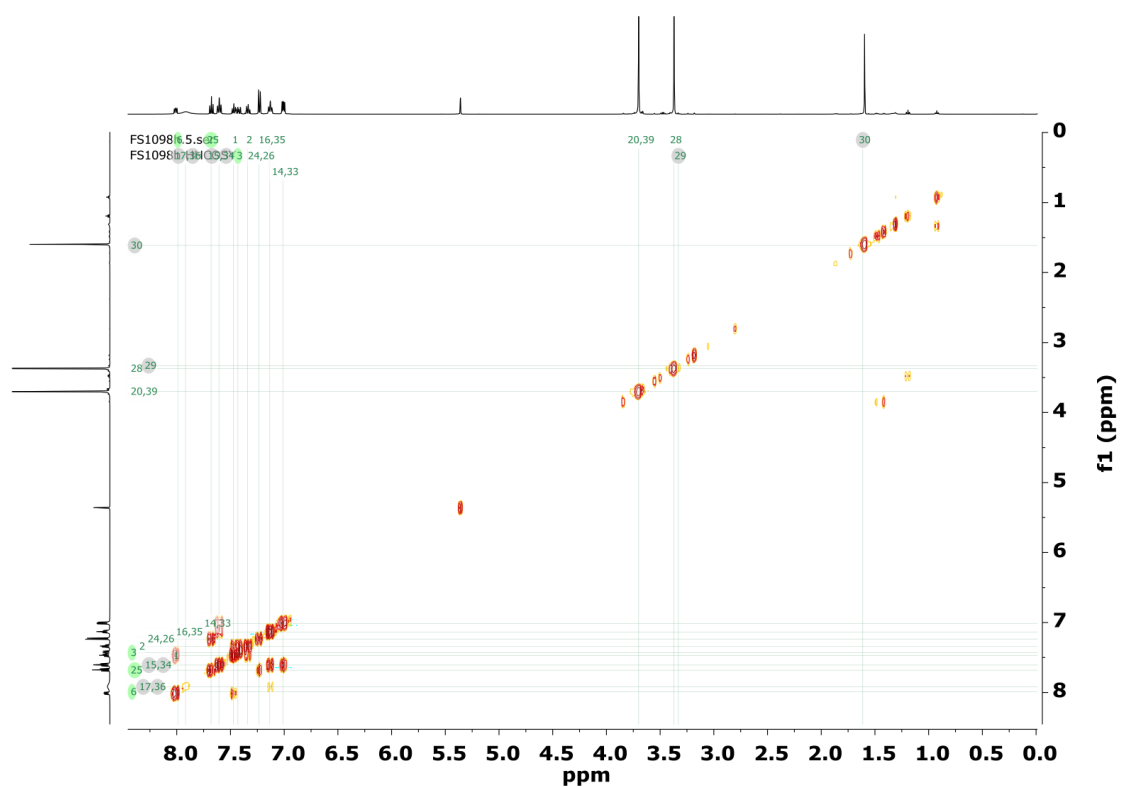

**Supplementary Figure 7.**  $^1\text{H}$ - $^1\text{H}$  COSY spectrum of reference compound **[Pd]-1-CO** ( $\text{CD}_2\text{Cl}_2$ ,  $25^\circ\text{C}$ ).

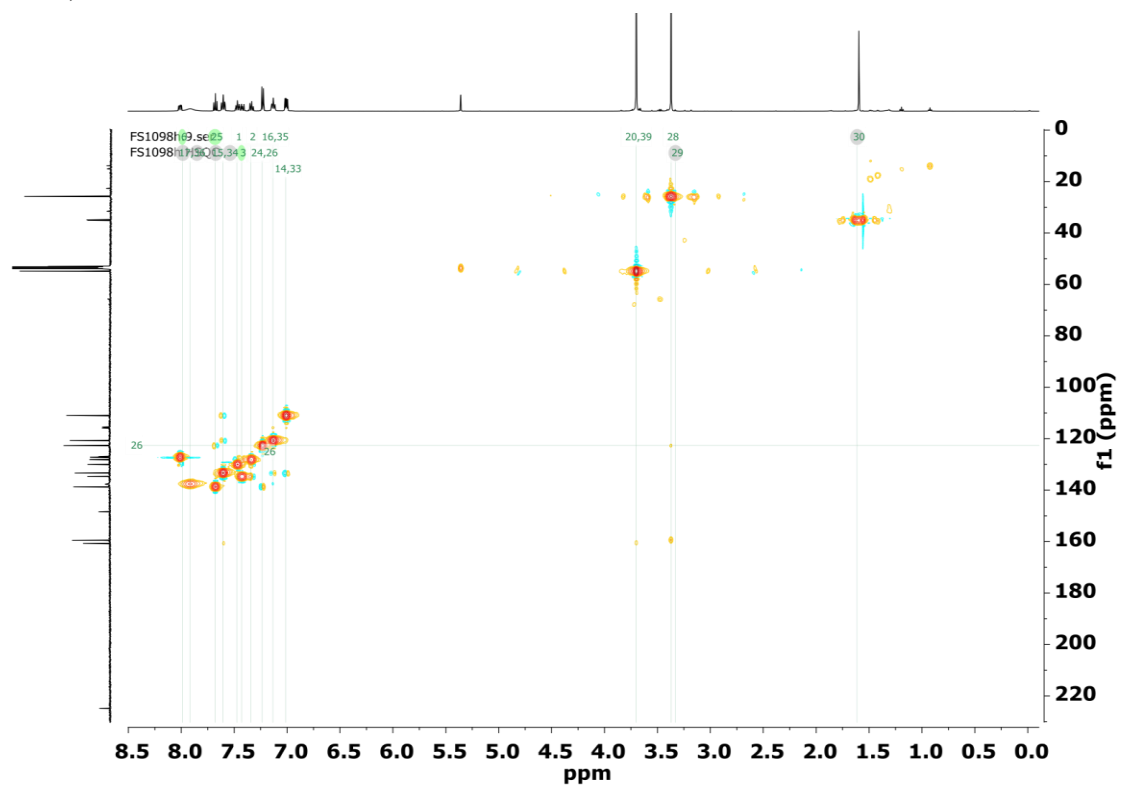

**Supplementary Figure 8.**  $^1\text{H}$ - $^{13}\text{C}$  HSQC spectrum of reference compound **[Pd]-1-CO** ( $\text{CD}_2\text{Cl}_2$ ,  $25^\circ\text{C}$ ).

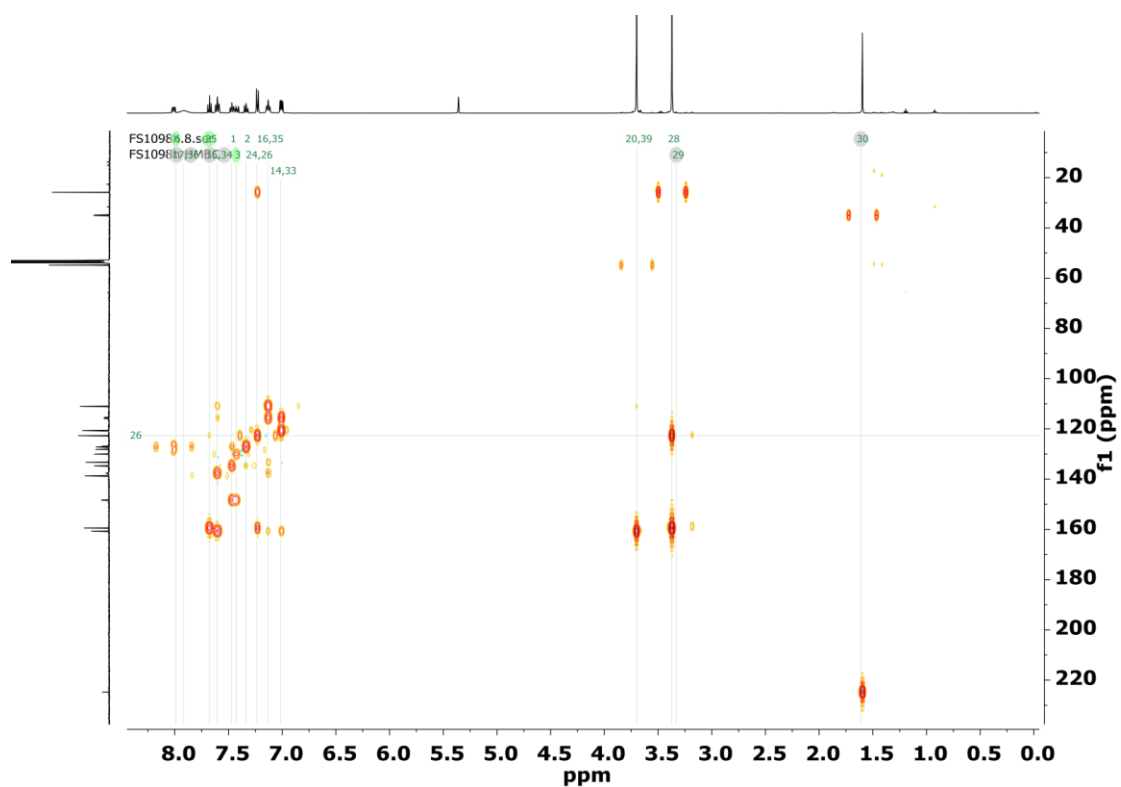

**Supplementary Figure 9.**  $^1\text{H}$ - $^{13}\text{C}$  HMBC spectrum of reference compound **[Pd]-1-CO** ( $\text{CD}_2\text{Cl}_2$ ,  $25^\circ\text{C}$ ).

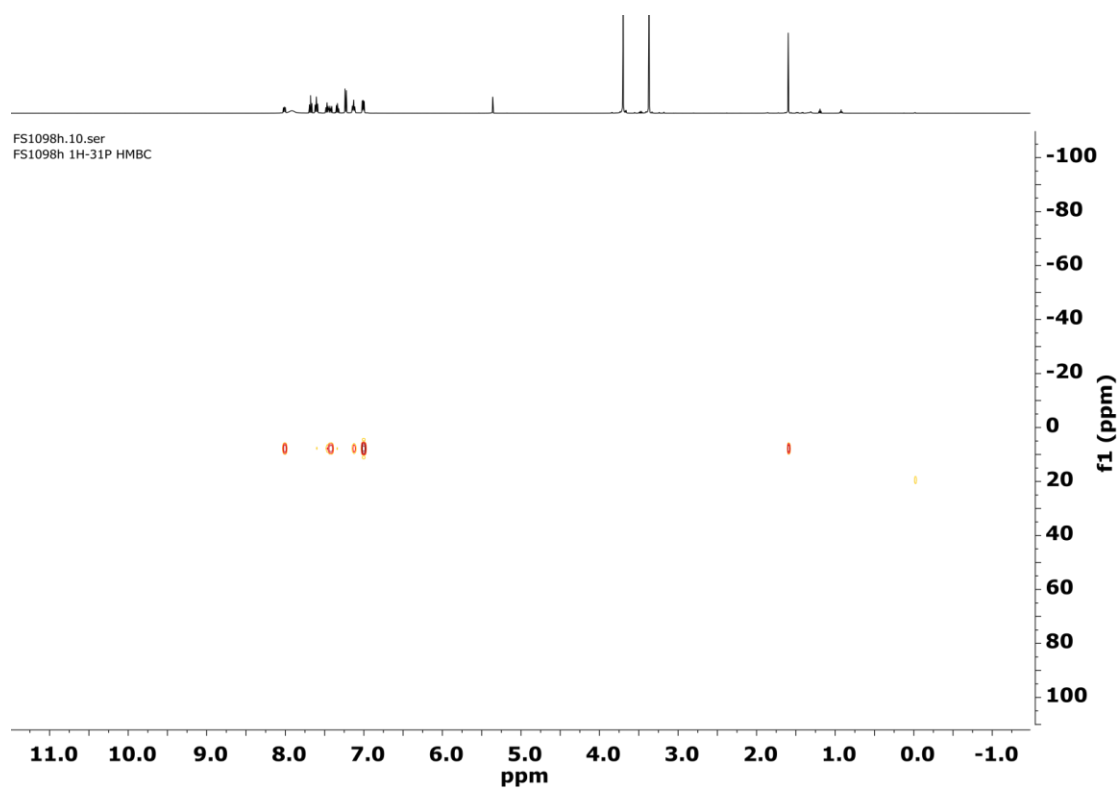

**Supplementary Figure 10.**  $^1\text{H}$ - $^{31}\text{P}$  HMBC spectrum of reference compound **[Pd]-1-CO** ( $\text{CD}_2\text{Cl}_2$ ,  $25^\circ\text{C}$ ).

## X-ray crystallographic analysis for [Pd]-1-CO

X-ray crystallographic analyses were performed on a Rigaku XtaLAB mini II diffractometer. For XRD measurements the samples were suspended in paraffin oil on a microscope slide (the samples were manipulated and transported under argon). Then - if necessary - a single crystalline piece was quickly cut out with a FEATHER brand ophthalmic scalpel utilizing polarizing light microscopy under air. Suitable crystals were quickly taken up on a loop and mounted on the goniometer head under a stream of chilled nitrogen (169.98(10) K). Processing of the raw diffraction data was done with CrysAlisPro. Via Olex2,<sup>5</sup> the structures were solved with the ShelXT<sup>6</sup> structure solution program using Intrinsic Phasing and refined with the ShelXL<sup>7</sup> refinement package using Least Squares minimization. Special refinement details are given for the respective structures as comments after the tables. Hydrogens were placed by AFIX instructions. **Deposition Number 2096472** contains the supplementary crystallographic data for this paper. These data are provided free of charge by the joint Cambridge Crystallographic Data Centre and Fachinformationszentrum Karlsruhe Access Structures service [www.ccdc.cam.ac.uk/structures](http://www.ccdc.cam.ac.uk/structures). Crystallographic data and refinement parameters are summarized in Table S1.

**Table S1. Crystallographic data for complex ([Pd]-1-CO)<sup>a</sup>**

|                                      |                                                                                          |
|--------------------------------------|------------------------------------------------------------------------------------------|
| Name(CCDC-#)                         | <b>[Pd]-1-CO</b> (CCDC-2096472)                                                          |
| Empirical formula                    | C <sub>30.25</sub> H <sub>30</sub> D <sub>2</sub> Cl <sub>2.5</sub> NO <sub>6</sub> PPdS |
| Molecular Weight                     | 765.63                                                                                   |
| Crystal shape, colour                | block; colourless                                                                        |
| Crystal size [mm]                    | 0.38 x 0.34 x 0.21                                                                       |
| Temperature [K]                      | 169.98(10)                                                                               |
| Crystal system                       | monoclinic                                                                               |
| Space group                          | P2 <sub>1</sub> /n                                                                       |
| <i>a</i> [Å]                         | 15.3814(3)                                                                               |
| <i>b</i> [Å]                         | 10.4079(2)                                                                               |
| <i>c</i> [Å]                         | 20.9108(4)                                                                               |
| $\alpha$ [°]                         | 90                                                                                       |
| $\beta$ [°]                          | 106.894(2)                                                                               |
| $\gamma$ [°]                         | 90                                                                                       |
| <i>V</i> [Å <sup>3</sup> ]           | 3203.10(11)                                                                              |
| <i>Z</i>                             | 4                                                                                        |
| $\rho$ [g cm <sup>-3</sup> ] (calcd) | 1.588                                                                                    |
| $\mu$ [mm <sup>-1</sup> ]            | 0.947                                                                                    |
| <i>F</i> (000)                       | 1552.0                                                                                   |
| Index ranges                         | -21 ≤ <i>h</i> ≤ 21,<br>-14 ≤ <i>k</i> ≤ 14,<br>-29 ≤ <i>l</i> ≤ 29                      |
| Radiation                            | Mo K $\alpha$ ( $\lambda$ = 0.71073)                                                     |
| 2 $\theta$ interval [°]              | 4.412 ≤ 2 $\theta$ ≤ 61.182                                                              |
| Collected reflections                | 86390                                                                                    |

|                                                               |              |
|---------------------------------------------------------------|--------------|
| Independent Refl.; $R_{\text{int}}$                           | 9676; 0.0263 |
| Data/restraints/<br>parameters                                | 9676/13/426  |
| $wR_2$ (all data)                                             | 0.0821       |
| $R_1$ ( $I > 2\sigma(I)$ )                                    | 0.0306       |
| GooF on $F^2$                                                 | 1.078        |
| $\Delta\rho_{\text{max/min}}$ [ $\text{e } \text{\AA}^{-3}$ ] | 1.15/-1.12   |

<sup>a</sup>The structure contains disordered  $\text{CD}_2\text{Cl}_2$  molecules at the unit cell edges, which were modeled as Part -1/-2: Part -1 shows one non-disordered  $\text{CD}_2\text{Cl}_2$  molecule (C1AA/Cl2/Cl3; occupancy: 0.5) and a four-fold disordered second  $\text{CD}_2\text{Cl}_2$  molecule at a special position which was modeled by applying an occupancy of 0.5 to the carbon atom C and occupancies of 0.25 to the outer chlorine atoms Cl/Cl0A to account for the symmetry operations at the unit cell edge (The deuterium atoms in the latter  $\text{CD}_2\text{Cl}_2$  molecule could not be refined). Part -2 shows one  $\text{CD}_2\text{Cl}_2$  molecule (C0AA/Cl1/Cl4, occupancy: 0.5). The C-Cl distances of all  $\text{CD}_2\text{Cl}_2$  molecules were restrained with DFIX instructions (1.78 Å) to allow refinement. A DELU instruction was used on Cl4/C0AA/Cl1, while EADP restraints were applied for C/Cl/Cl0A to allow refinement of the partial four-fold disorder.

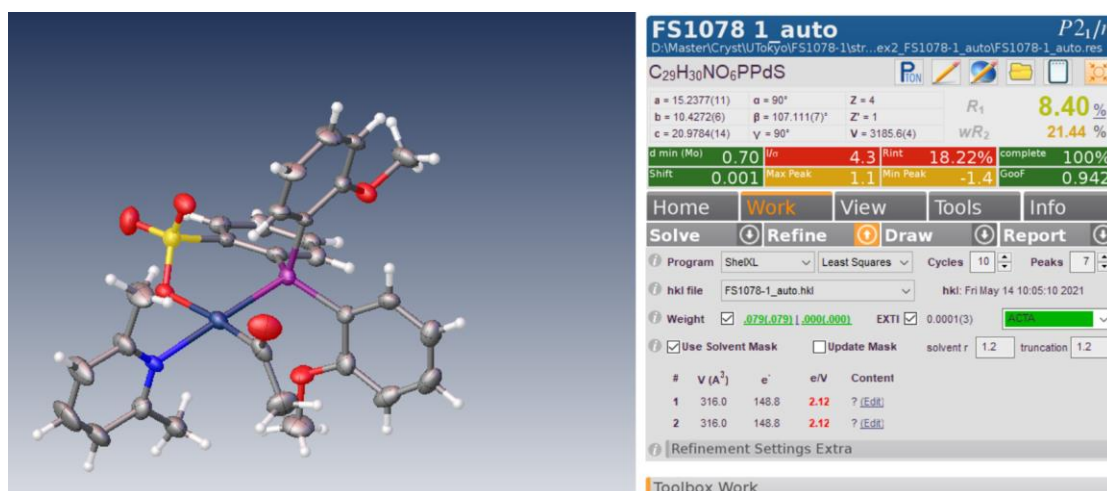

**Supplementary Figure 11.** Screenshot of the OLEX2 interface on the preliminary crystal structure of [Pd]-1-CO obtained from the green filtrate in the NMR experiment. SQUEEZE was used to account for the poorly disordered and co-crystallized  $\text{CD}_2\text{Cl}_2$  molecules.

## Proposed mechanism for CO transfer

Reported M-M and M-CO bond enthalpies<sup>8-10</sup> for different metal carbonyls are summarized in *Supplementary Table 1*. The experimental results, namely the CO incorporation ratios and quantity in the copolymers by using different metal carbonyls and **[Pd]-1** as the catalyst, are compared. The incorporated CO quantity in the copolymer per metal atom followed the order of  $\text{Fe}(\text{CO})_5 > \text{Fe}_2(\text{CO})_9 > \text{Mn}_2(\text{CO})_{10} (>> \text{Co}_2(\text{CO})_8 = 0)$ , which qualitatively follows the M-CO bond enthalpies (Entries 1/2/4/6). Nevertheless, the incorporated CO quantity in the copolymers is higher when CO gas is employed as the carbonyl source (Entry 7). It is worthy of noting that the reported M-M bond enthalpies for the bimetallic metal carbonyls  $\text{Fe}_2(\text{CO})_9$  and  $\text{Co}_2(\text{CO})_8$  are lower when compared with the corresponding M-CO bond dissociation energies. Therefore, 16/17-VE species can be formed from the bimetallic metal carbonyls via M-M bond scission, which are energetically more feasible than the direct M-CO dissociation by comparison of the bond enthalpies (Entries 1,3 and 6). For  $\text{Mn}_2(\text{CO})_{10}$ , a wide range of M-M bond enthalpies have been reported that partially seem to exceed the M-CO bond enthalpies.<sup>8,9</sup>

**Supplementary Table 1. Bond enthalpies of metal carbonyls and their effects on carbonyl incorporation with **[Pd]-1** as the catalyst**

| Entry | Carbonyl source                        | $E(\text{M-M})$<br>(kJ mol <sup>-1</sup> ) | $E(\text{M-CO})$<br>(kJ mol <sup>-1</sup> ) | n ( $\text{M}_x(\text{CO})_y$ )<br>or n(CO gas)<br>(mmol) | Incorporation<br>ratio (i. r. %) | Incorporated<br>CO ( $\mu\text{mol}$ ) <sup>a</sup> | I/A <sup>b</sup> |
|-------|----------------------------------------|--------------------------------------------|---------------------------------------------|-----------------------------------------------------------|----------------------------------|-----------------------------------------------------|------------------|
| 1     | <b>Mn<sub>2</sub>(CO)<sub>10</sub></b> | 94 <sup>8</sup> / 159 <sup>9</sup>         | 151 <sup>9</sup>                            | 0.25                                                      | 0.14                             | 31.8                                                | >99:1            |
| 2     | <b>Fe(CO)<sub>5</sub></b>              | -                                          | 117 <sup>10</sup>                           | 0.50                                                      | 0.16                             | 91.8                                                | >99:1            |
| 3     | <b>Fe<sub>2</sub>(CO)<sub>9</sub></b>  | 70 <sup>10</sup>                           | 123 <sup>10</sup>                           | 0.10                                                      | 1.1                              | 76.5                                                | 99:1             |
| 4     | <b>Fe<sub>2</sub>(CO)<sub>9</sub></b>  | 70 <sup>10</sup>                           | 123 <sup>10</sup>                           | 0.25                                                      | 1.6                              | 65.6                                                | 96:4             |
| 5     | <b>Fe<sub>2</sub>(CO)<sub>9</sub></b>  | 70 <sup>10</sup>                           | 123 <sup>10</sup>                           | 0.50                                                      | 3.1                              | 64.1                                                | 91:9             |
| 6     | <b>Co<sub>2</sub>(CO)<sub>8</sub></b>  | 70 <sup>10</sup>                           | 136 <sup>10</sup>                           | 0.25                                                      | -                                | -                                                   | -                |
| 7     | <b>CO gas</b>                          |                                            |                                             | ca. 0.25                                                  | 0.31                             | 119                                                 | 67:33            |

<sup>a</sup>Approximate amount of total incorporated CO in  $\mu\text{mol}$  calculated as follows: i. r.  $\times$  m(polymer) / MW(ethylene).

<sup>b</sup>The I/A ratio was determined by <sup>1</sup>H NMR analysis. I/A = Isolated carbonyls/Alternating carbonyls.

As revealed in Table 1 of the main text, palladium phosphine-sulfonate complexes are important for successful carbonyl incorporation. Almost no CO incorporation was observed with palladium NHC-phenolate and bisphosphine-monoxide complexes. One potential reason for this could be that the pending S=O arms of the sulfonate moiety acted as ligands, which allows dissociation of CO from the metal carbonyls or cause intramolecular CO transfer from the coordinated metal carbonyls to the palladium center. A plausible mechanism for CO transfer from  $\text{Fe}_2(\text{CO})_9$  to **[Pd]-1** is presented in Supplementary Figure S12. First, disproportionation of  $\text{Fe}_2(\text{CO})_9$  would lead to the formation of a 16-VE  $\text{Fe}(\text{CO})_4$  and a 18-VE  $\text{Fe}(\text{CO})_5$ . Coordination of S=O units of the phosphine-sulfonate complexes to  $\text{Fe}(\text{CO})_4$  would afford a more stable 18-VE species. At last, slow intramolecular CO transfer might take place at the nearby polymerization site. Based on the control experiments for thermal decomposition of  $\text{Fe}_2(\text{CO})_9$  for slow CO release (See main text, Table 1, entry 5) and the experiment with CO gas (See main text, Table 1, entry 6), an interaction of

the catalyst with the metal carbonyl precursors was likely to be the key for efficient incorporation of isolated CO units into the copolymers.

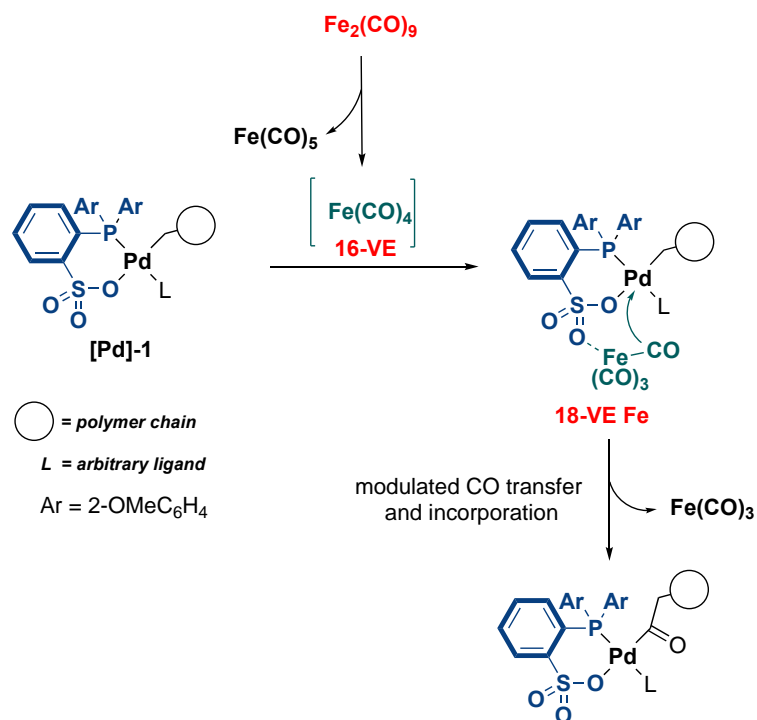

**Supplementary Figure 12.** Proposed mechanism for the CO transfer from  $\text{Fe}_2(\text{CO})_9$  to  $[\text{Pd}]\text{-1}$ .

## Photodegradation experiment

**UV photoreactor setup:** A 24.5 x 11 x 7.5 cm (length x width x height) aluminum box was equipped with two fans on the long sides to control heat buildup during operation, which kept the internal temperature at ca. 30 °C. To the outside of the fans was attached a foam filter to prevent dust buildup in the reaction chamber. The filters were further covered on the outside with paper towels to prevent UV light leakage during experiments. An array of 21 LED lamps (Qingdao Jason Electric Co.: [www.qdjason.com](http://www.qdjason.com); Model: P35-10A; 275 nm peak wavelength; for further information see the LED data specification sheet under: [http://qdjason.hubers.cn/uploads/soft/210507/1\\_1735383781.pdf](http://qdjason.hubers.cn/uploads/soft/210507/1_1735383781.pdf)) was attached to the inside of the aluminum cover with screws. On the outside of the cover, above the LED module, two passively cooled aluminum heat sinks were attached which kept the LED module at ca. 36 °C during 50 h operation. The floor of the irradiation chamber was covered with aluminum foil. The polymer samples were spread out in a quartz NMR tube to prevent the samples to be blown away by the fans. The tube was placed on the aluminum foil on the chamber floor, 7 cm away from the LED module. The LED array was powered by a 19V / 3.4 A power supply (Go Forward Enterprise Corp.; Model No: GF65L-US1934), the fans were powered by a switching power supply at 7.5 V / 900 mA (MW; Model No.: MW7EA08EL).

**Experimental procedure for polymer degradation:** The powdery polymer samples in quartz NMR tubes were placed on the bottom of the UV photoreactor. Irradiation test was then carried out at 30 °C under UV irradiation for 50 h. The molecular weight and polydispersity were determined by size exclusion chromatography.

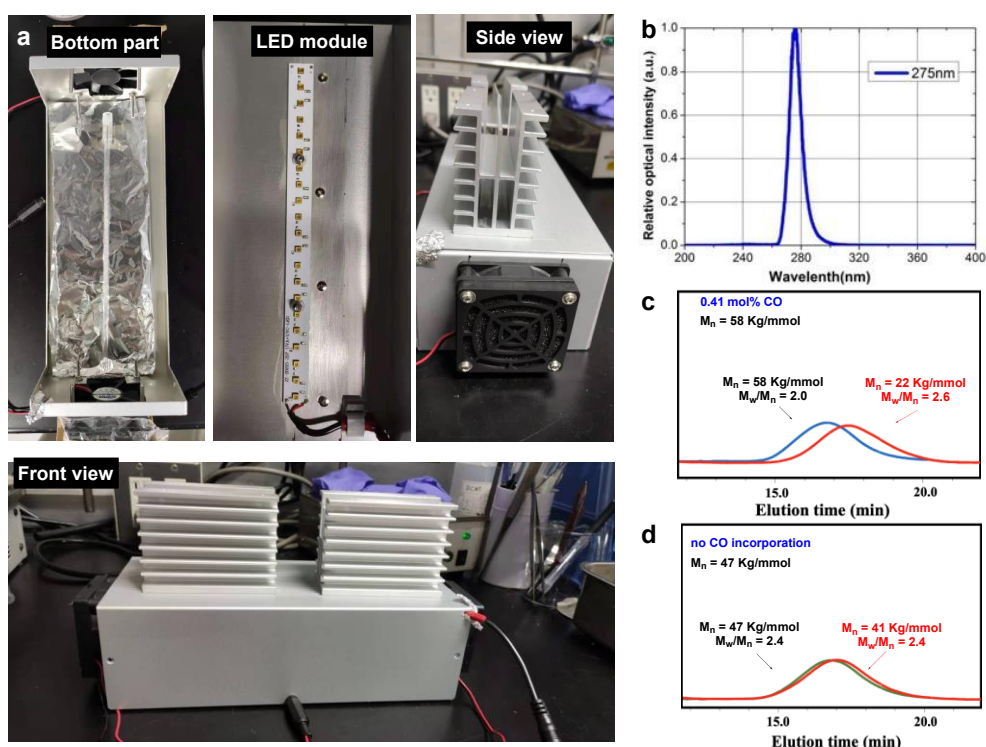

**Supplementary Figure 13.** Photodegradation experiments. (a) UV photoreactor setup. (b) Spectrum of the UV-LED light emission. (c) SEC trace of the polymer in Table 1, entry 12 before (Blue line) and after (Red line) UV irradiation. (d) SEC trace of the polyethylene in Table 1, entry 15 before (Green line) and after (Red line) UV irradiation.

## Copies of NMR spectra of the polymers

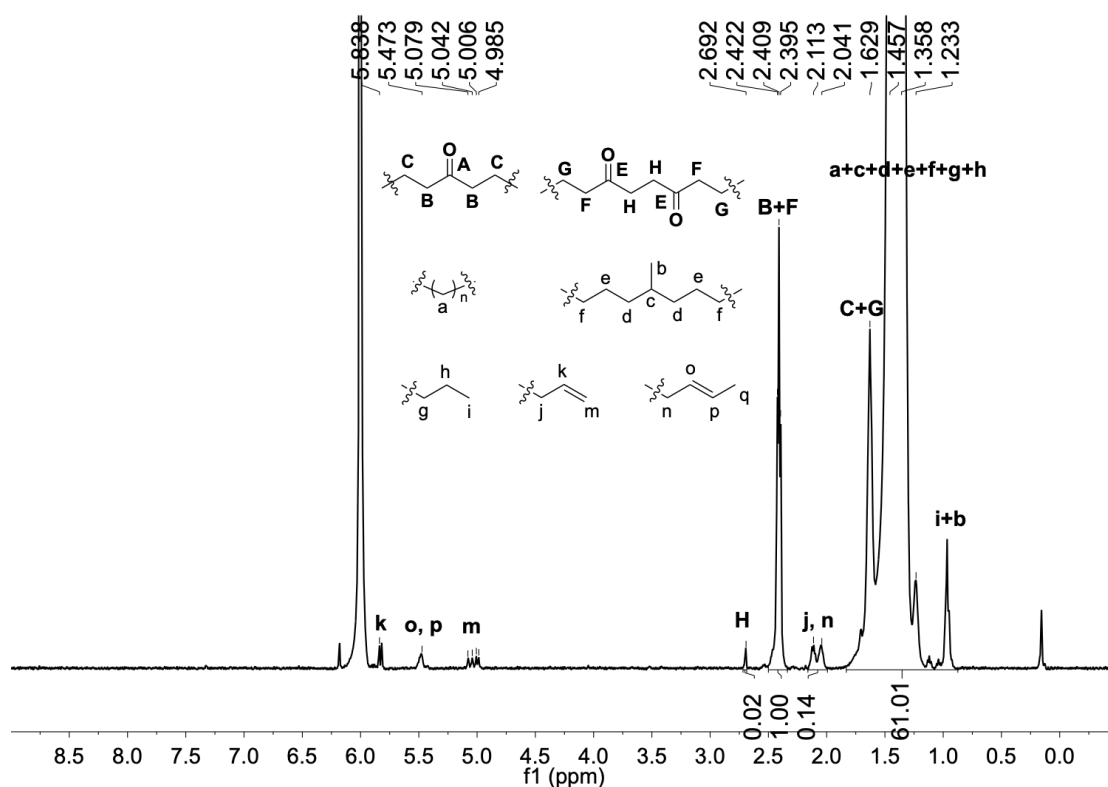

**Supplementary Figure 14.** <sup>1</sup>H NMR spectrum of the polymer obtained in Table 1, entry 1 (1,1,2,2-tetrachloroethane-*d*<sub>2</sub>, 500 MHz, 120 °C).

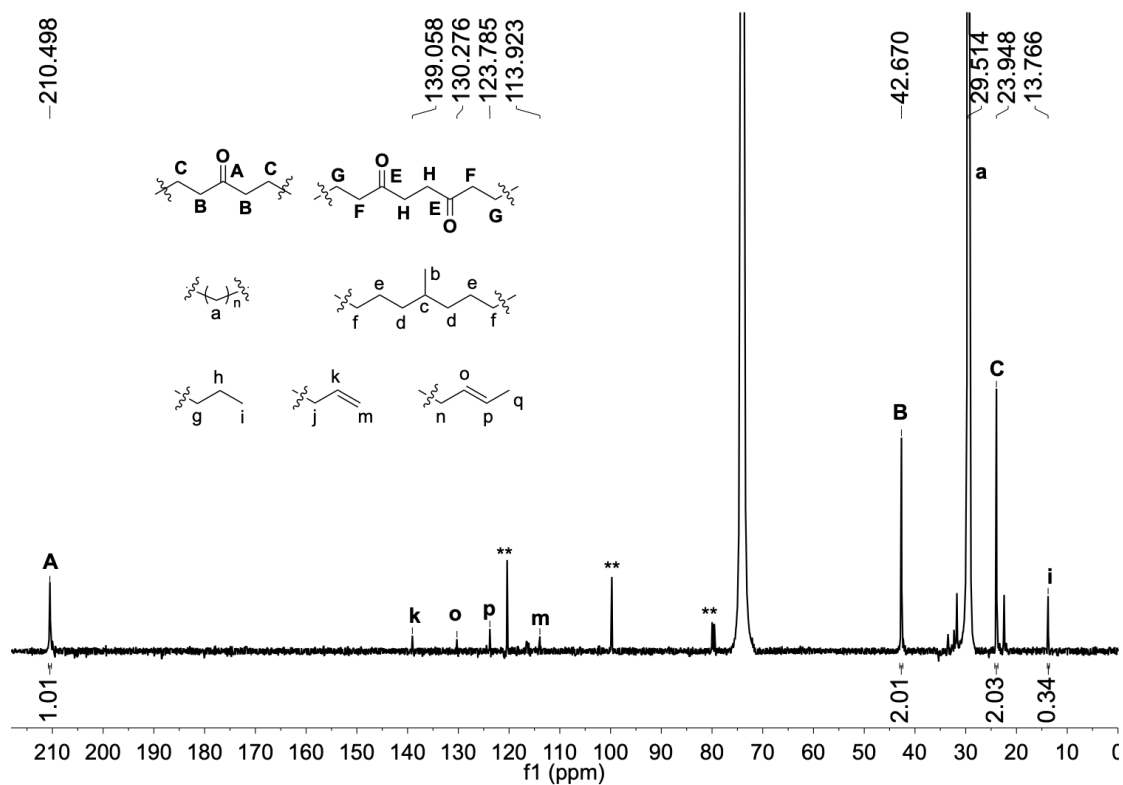

**Supplementary Figure 15.** Quantitative <sup>13</sup>C NMR spectrum of the polymer obtained in Table 1, entry 1 (1,1,2,2-tetrachloroethane-*d*<sub>2</sub>, 126 MHz, 120 °C).



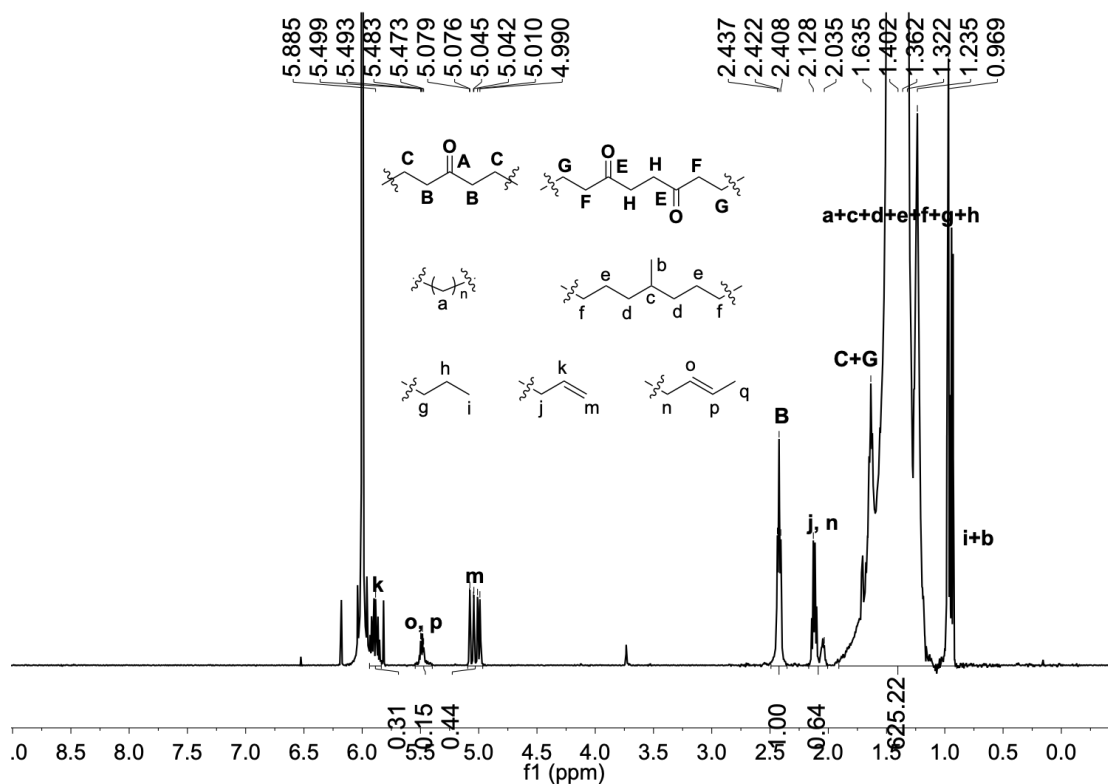

**Supplementary Figure 16.** <sup>1</sup>H NMR spectrum of the polymer obtained in Table 1, entry 2 (1,1,2,2-tetrachloroethane-*d*<sub>2</sub>, 500 MHz, 120 °C).

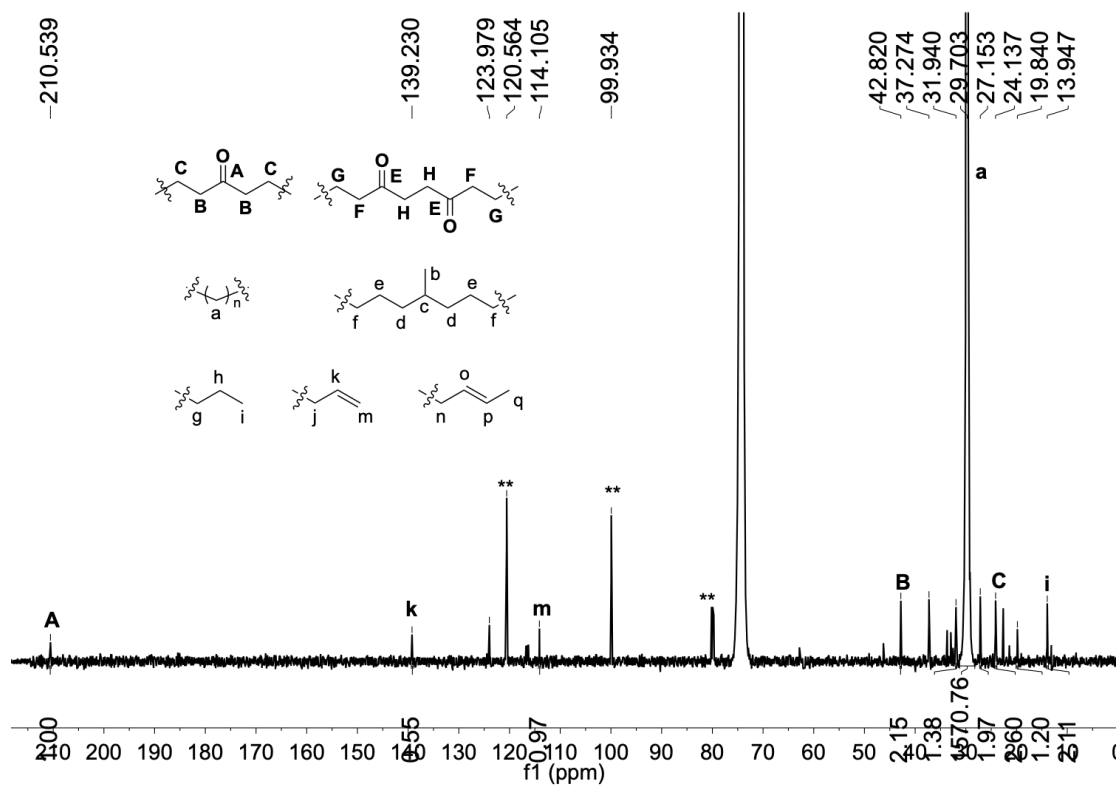

**Supplementary Figure 17.** Quantitative <sup>13</sup>C NMR spectrum of the polymer obtained in Table 1, entry 2 (1,1,2,2-tetrachloroethane-*d*<sub>2</sub>, 126 MHz, 120 °C).

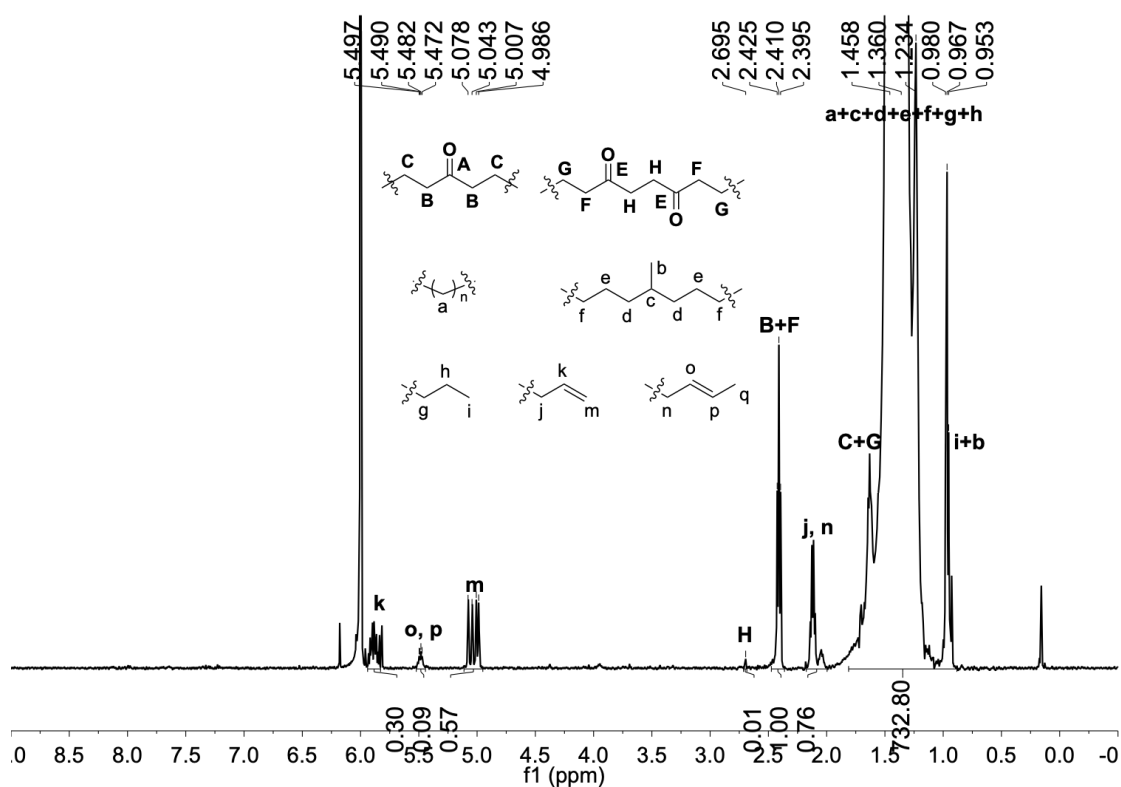

**Supplementary Figure 18.** <sup>1</sup>H NMR spectrum of the polymer obtained in Table 1, entry 3 (1,1,2,2-tetrachloroethane-*d*<sub>2</sub>, 500 MHz, 120 °C).

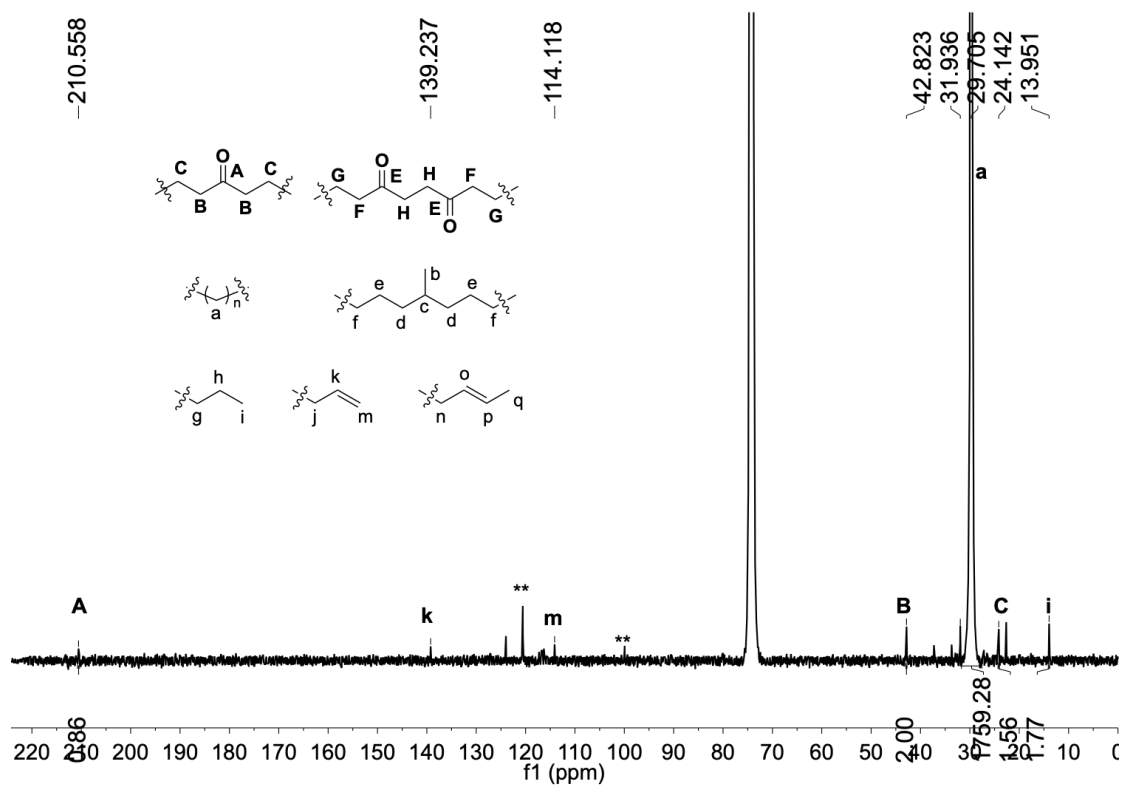

**Supplementary Figure 19.** Quantitative <sup>13</sup>C NMR spectrum of the polymer obtained in Table 1, entry 3 (1,1,2,2-tetrachloroethane-*d*<sub>2</sub>, 126 MHz, 120 °C).

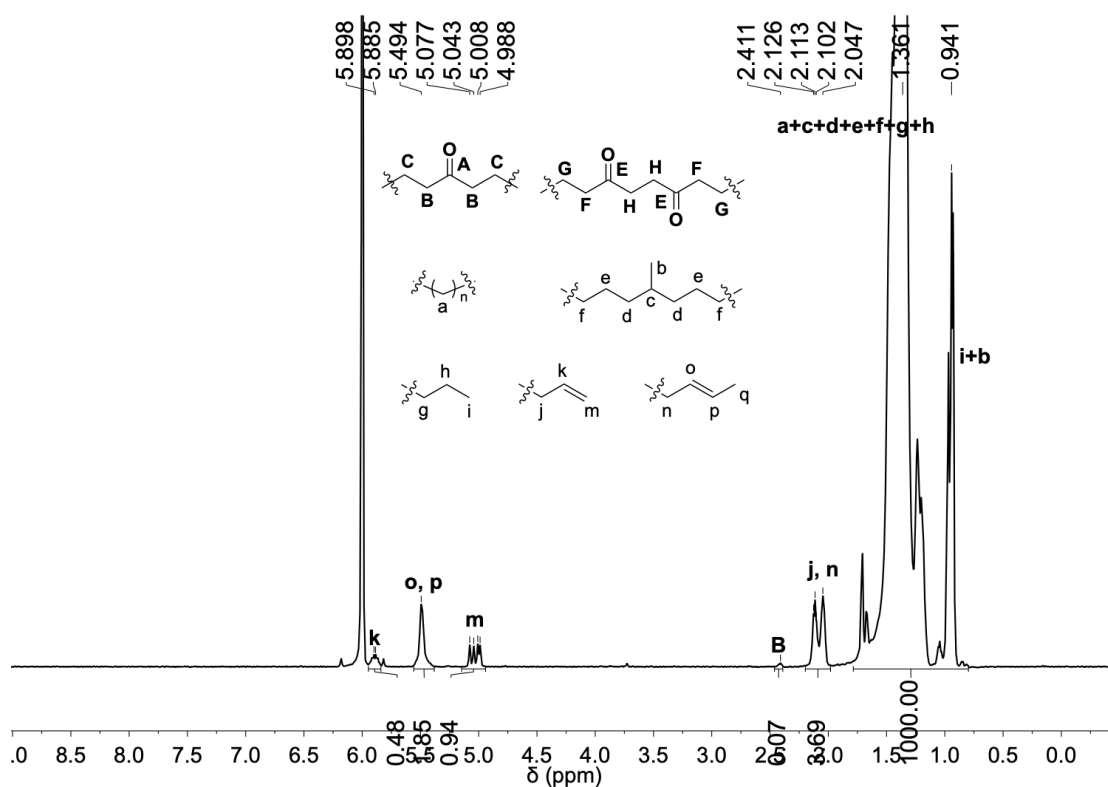

**Supplementary Figure 20.** <sup>1</sup>H NMR spectrum of the polymer obtained in Table 1, entry 5 (1,1,2,2-tetrachloroethane-*d*<sub>2</sub>, 500 MHz, 120 °C).

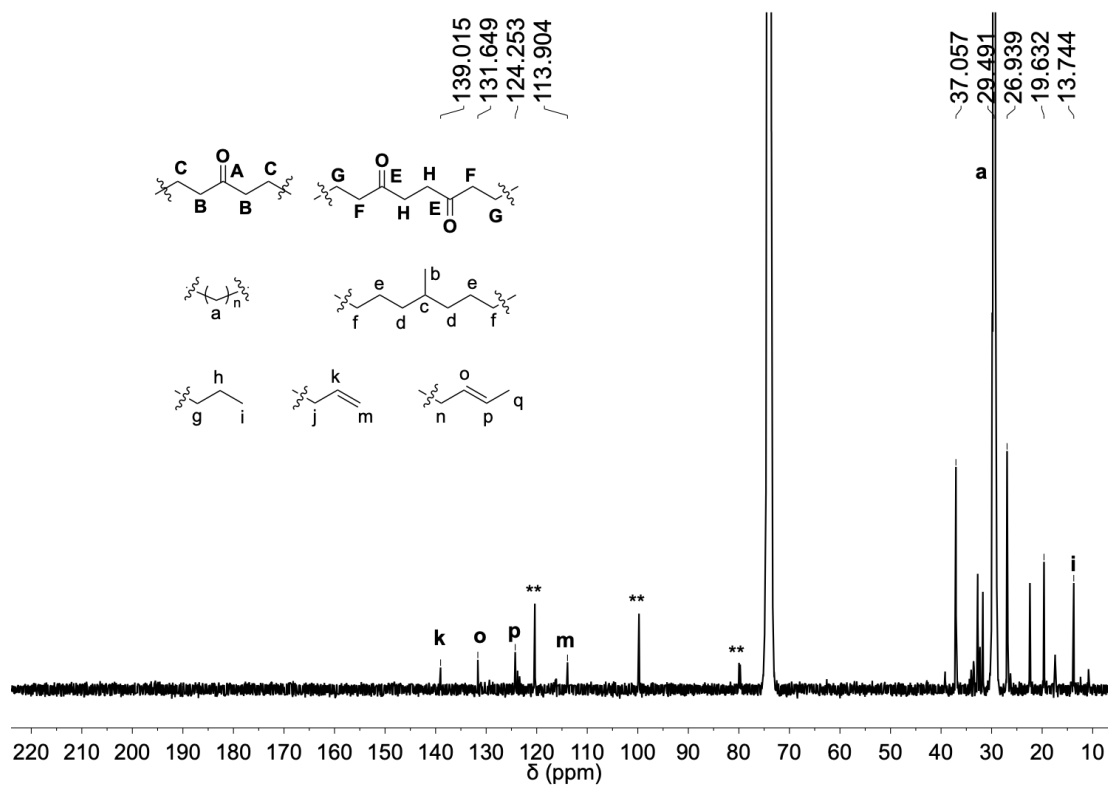

**Supplementary Figure 21.** Quantitative <sup>13</sup>C NMR spectrum of the polymer obtained in Table 1, entry 5 (1,1,2,2-tetrachloroethane-*d*<sub>2</sub>, 126 MHz, 120 °C).

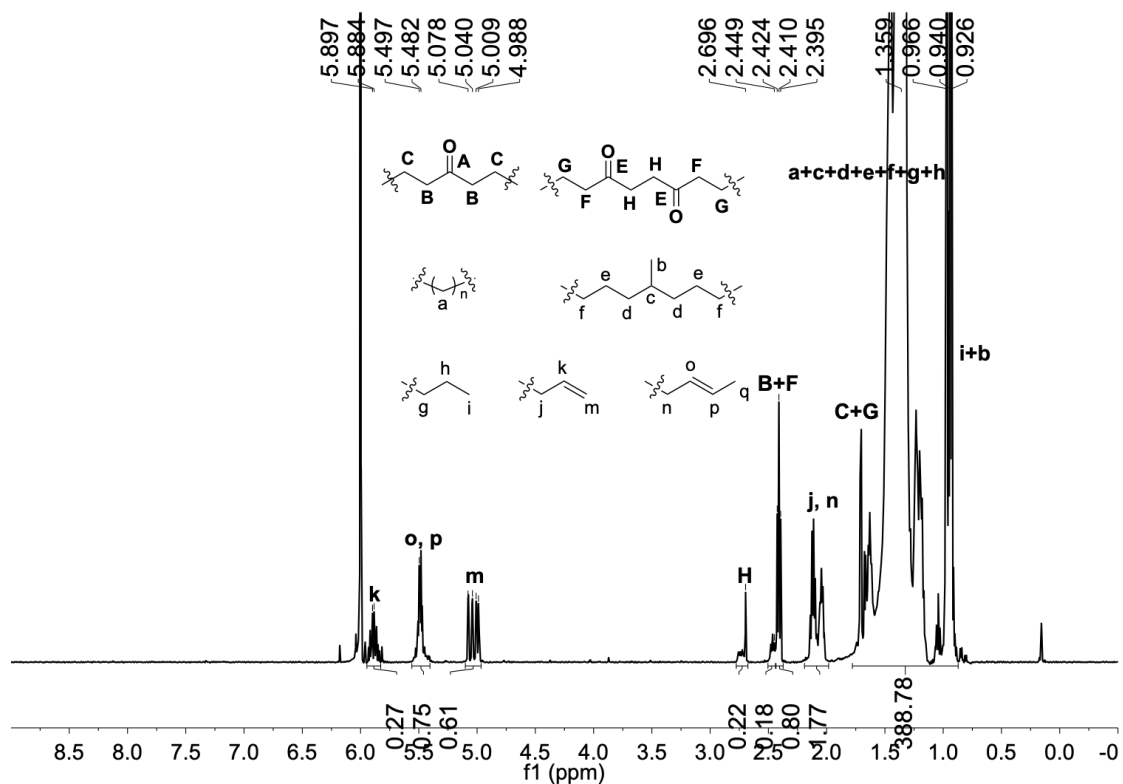

**Supplementary Figure 22.** Supplementary Figure 1. <sup>1</sup>H NMR spectrum of the polymer obtained in Table 1, entry 6 (1,1,2,2-tetrachloroethane-*d*<sub>2</sub>, 500 MHz, 120 °C).

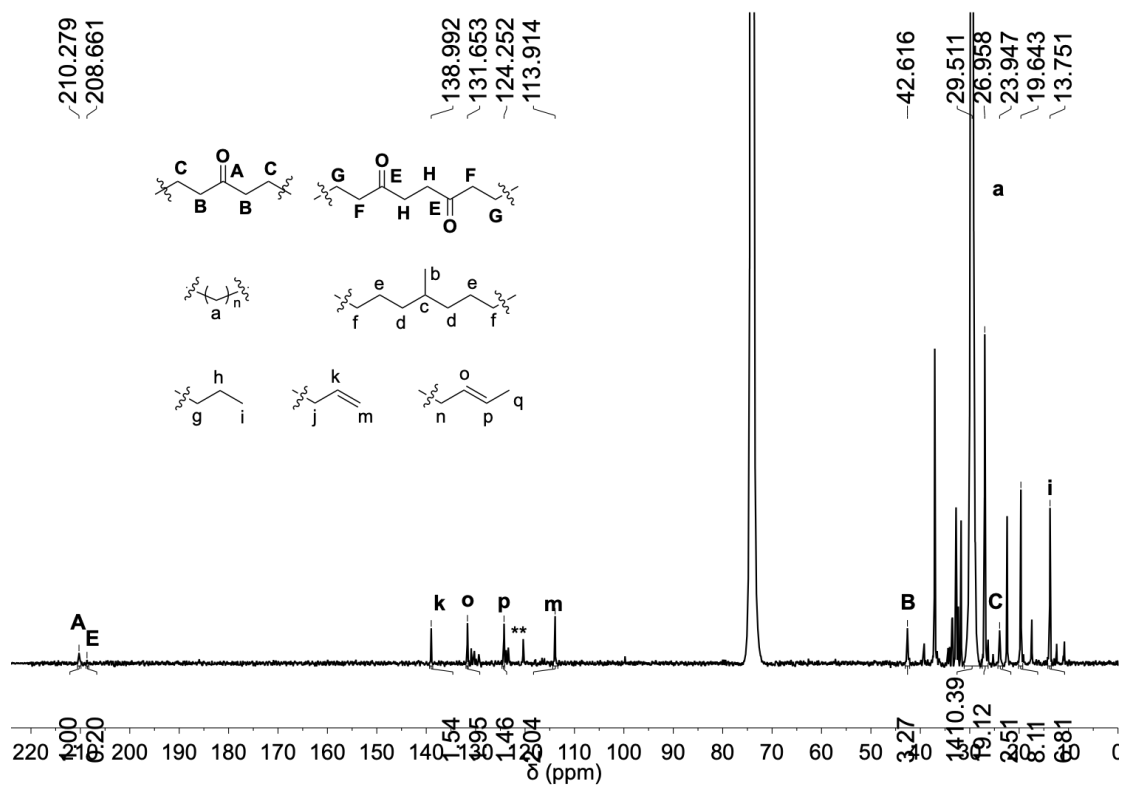

**Supplementary Figure 23.** Quantitative <sup>13</sup>C NMR spectrum of the polymer obtained in Table 1, entry 6 (1,1,2,2-tetrachloroethane-*d*<sub>2</sub>, 126 MHz, 120 °C).

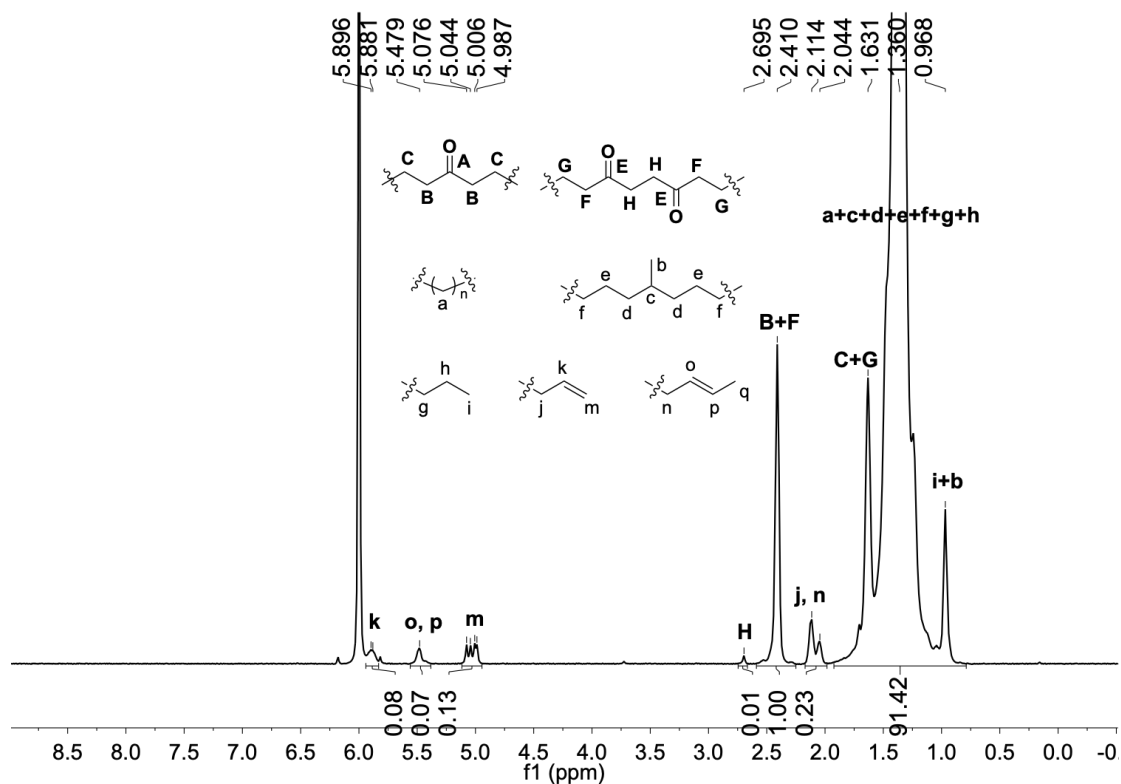

**Supplementary Figure 24.** <sup>1</sup>H NMR spectrum of the polymer obtained in Table 1, entry 7 (1,1,2,2-tetrachloroethane-*d*<sub>2</sub>, 500 MHz, 120 °C).

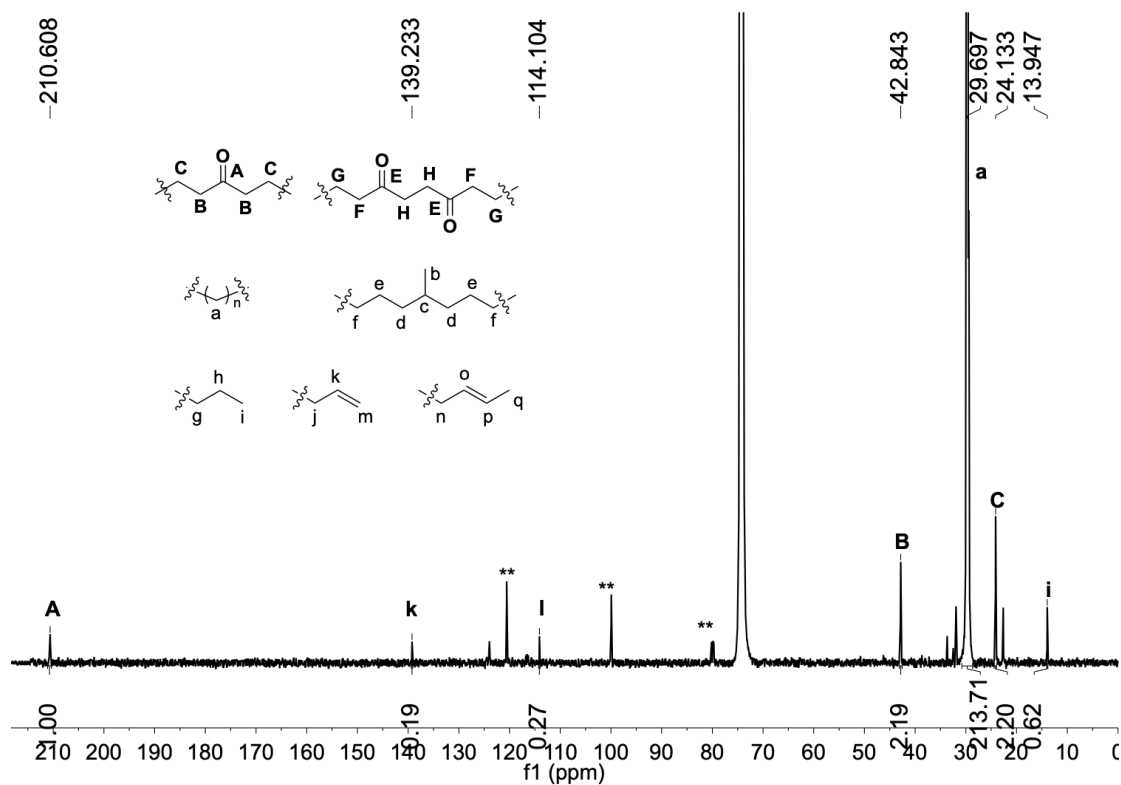

**Supplementary Figure 25.** Quantitative <sup>13</sup>C NMR spectrum of the polymer obtained in Table 1, entry 7 (1,1,2,2-tetrachloroethane-*d*<sub>2</sub>, 126 MHz, 120 °C).

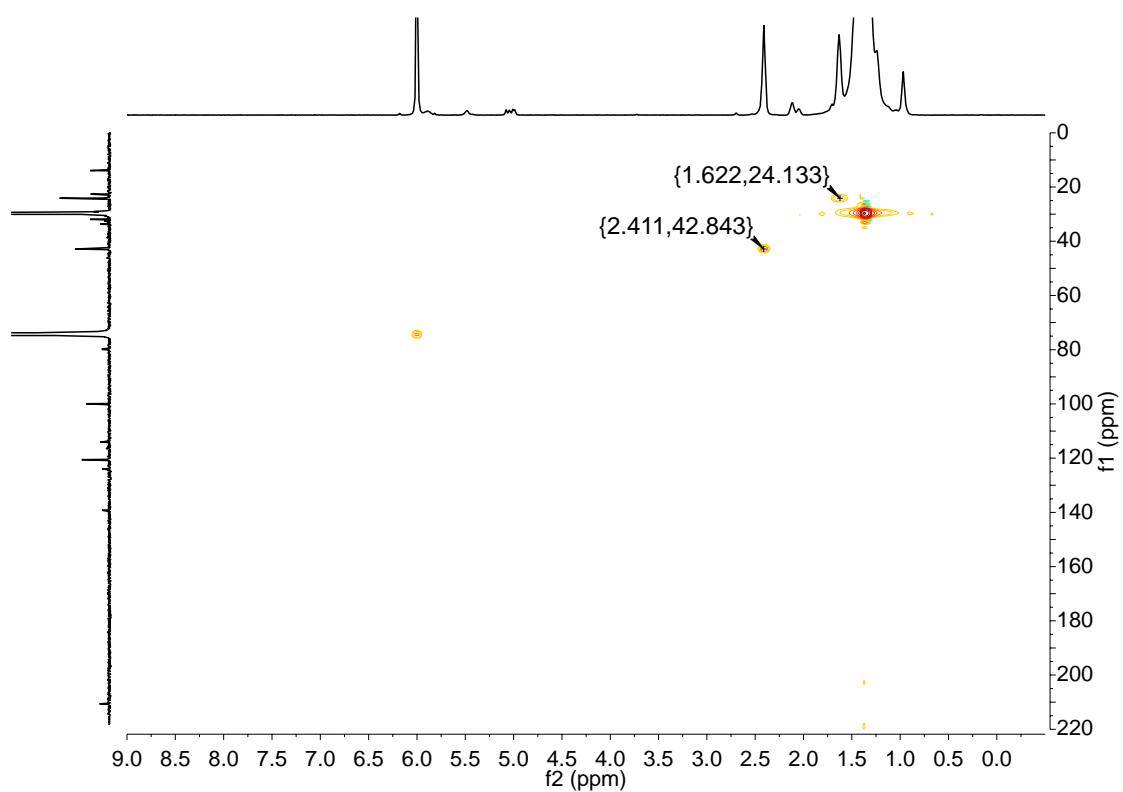

**Supplementary Figure 26.**  $^1\text{H}$ - $^{13}\text{C}$  HSQC spectrum of the polymer obtained in Table 1, entry 7 (1,1,2,2-tetrachloroethane- $d_2$ , 500 MHz, 120 °C).

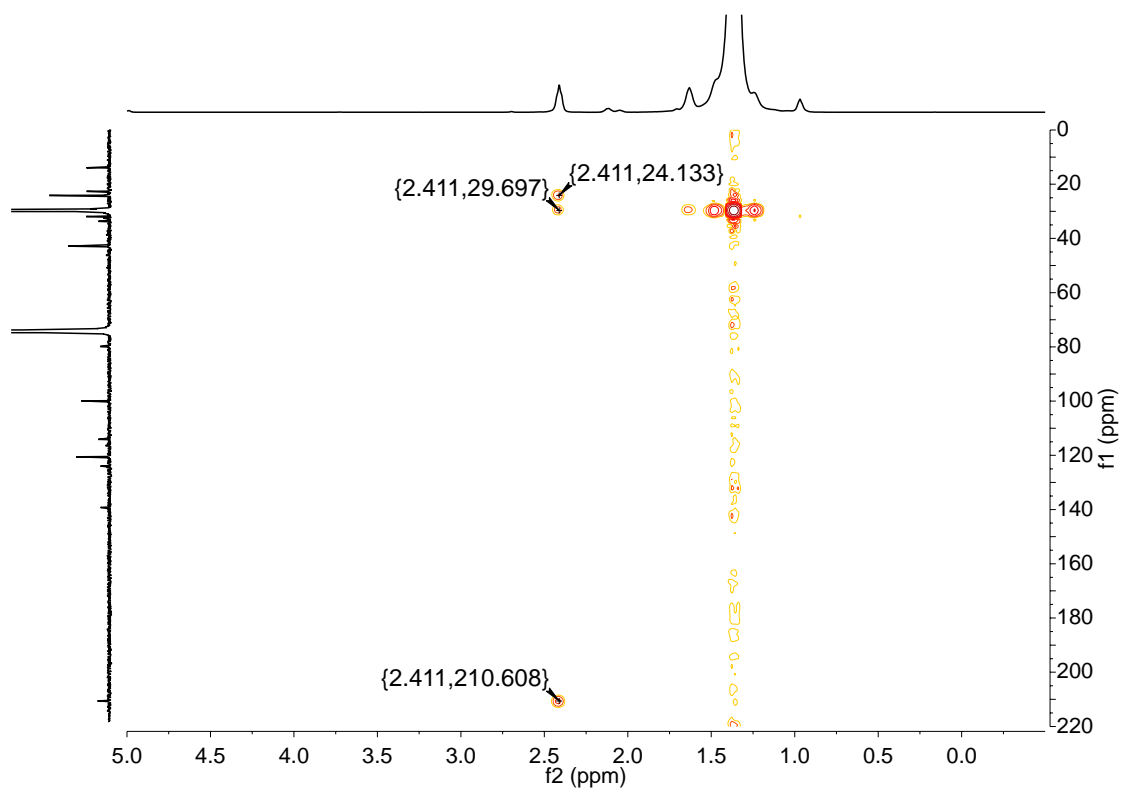

**Supplementary Figure 27.**  $^1\text{H}$ - $^{13}\text{C}$  HMBC spectrum of the polymer obtained in Table 1, entry 7 (1,1,2,2-tetrachloroethane- $d_2$ , 500 MHz, 120 °C).

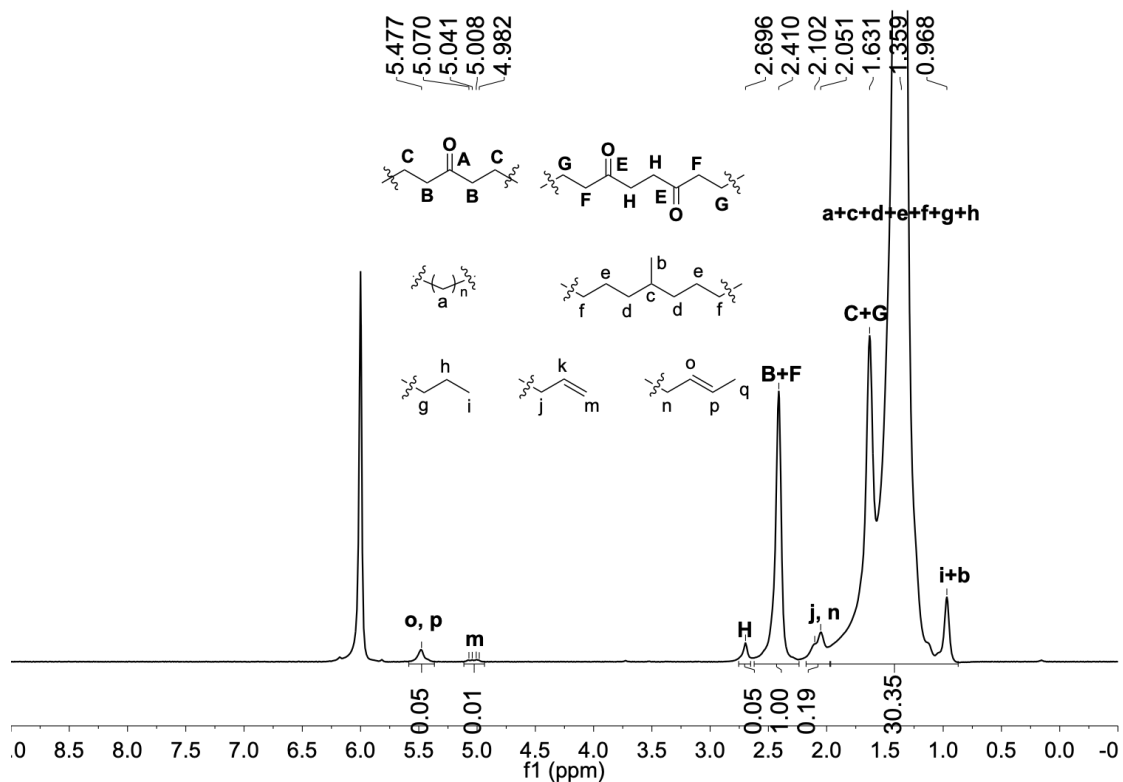

**Supplementary Figure 28.** <sup>1</sup>H NMR spectrum of the polymer obtained in Table 1, entry 8 (1,1,2,2-tetrachloroethane-*d*<sub>2</sub>, 500 MHz, 120 °C).

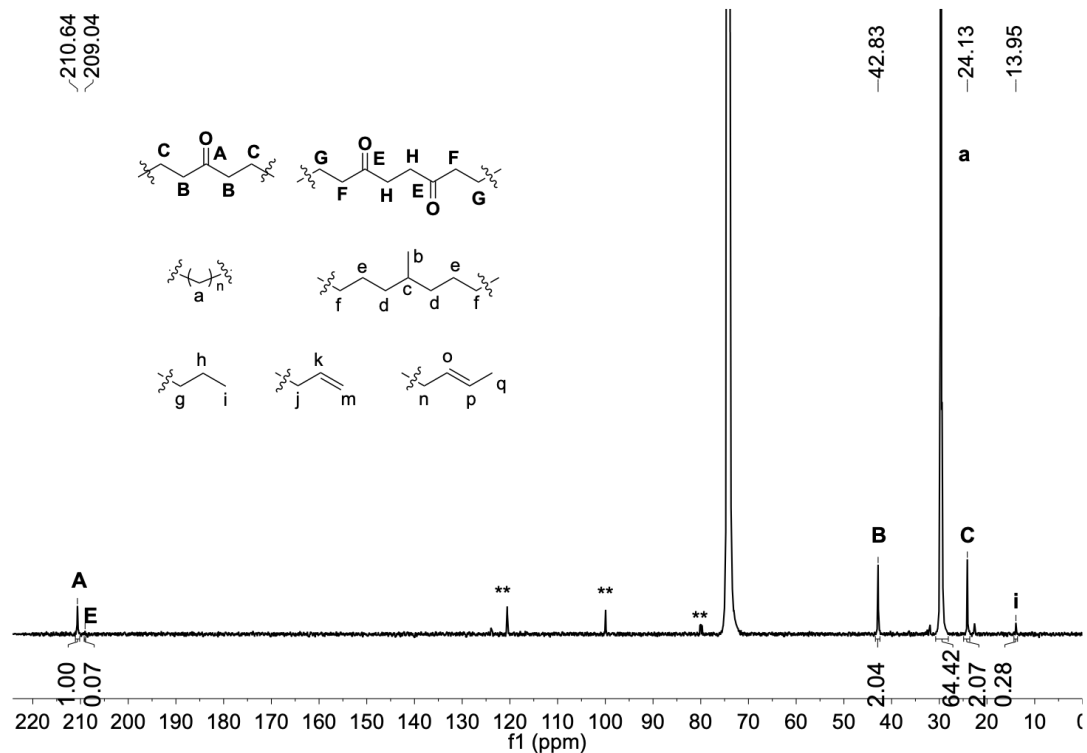

**Supplementary Figure 29.** Quantitative <sup>13</sup>C NMR spectrum of the polymer obtained in Table 1, entry 8 (1,1,2,2-tetrachloroethane-*d*<sub>2</sub>, 126 MHz, 120 °C).

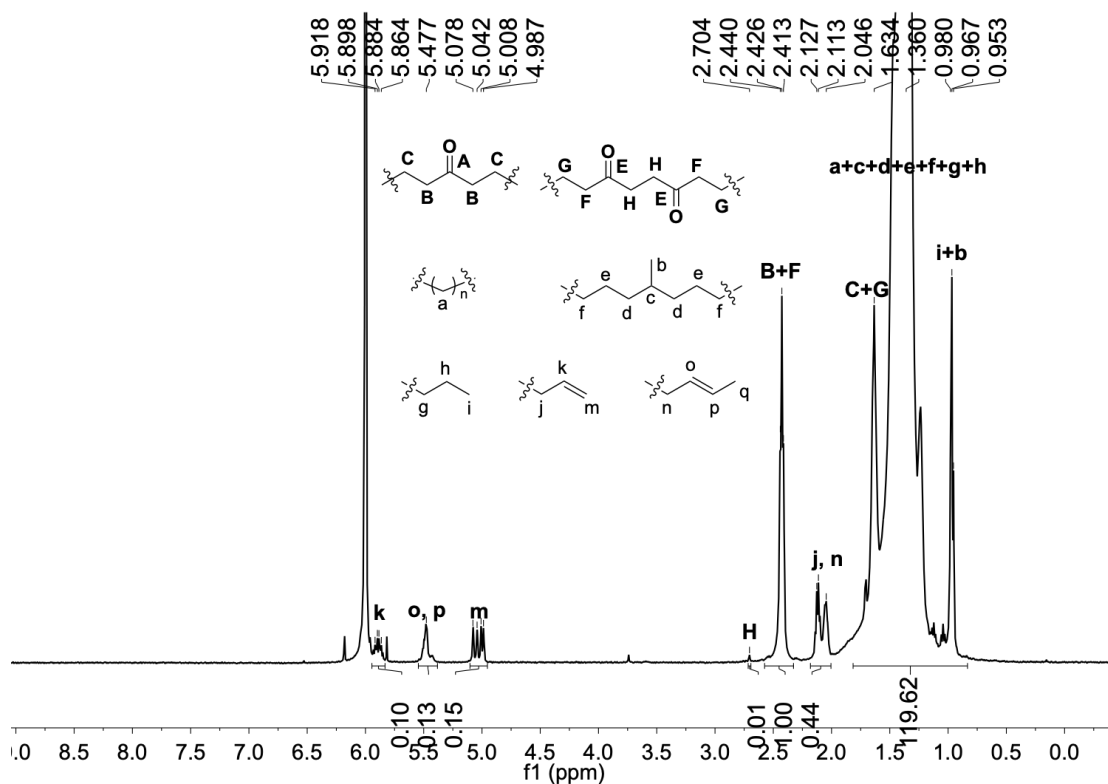

**Supplementary Figure 30.** <sup>1</sup>H NMR spectrum of the polymer obtained in Table 1, entry 9 (1,1,2,2-tetrachloroethane-*d*<sub>2</sub>, 500 MHz, 120 °C).

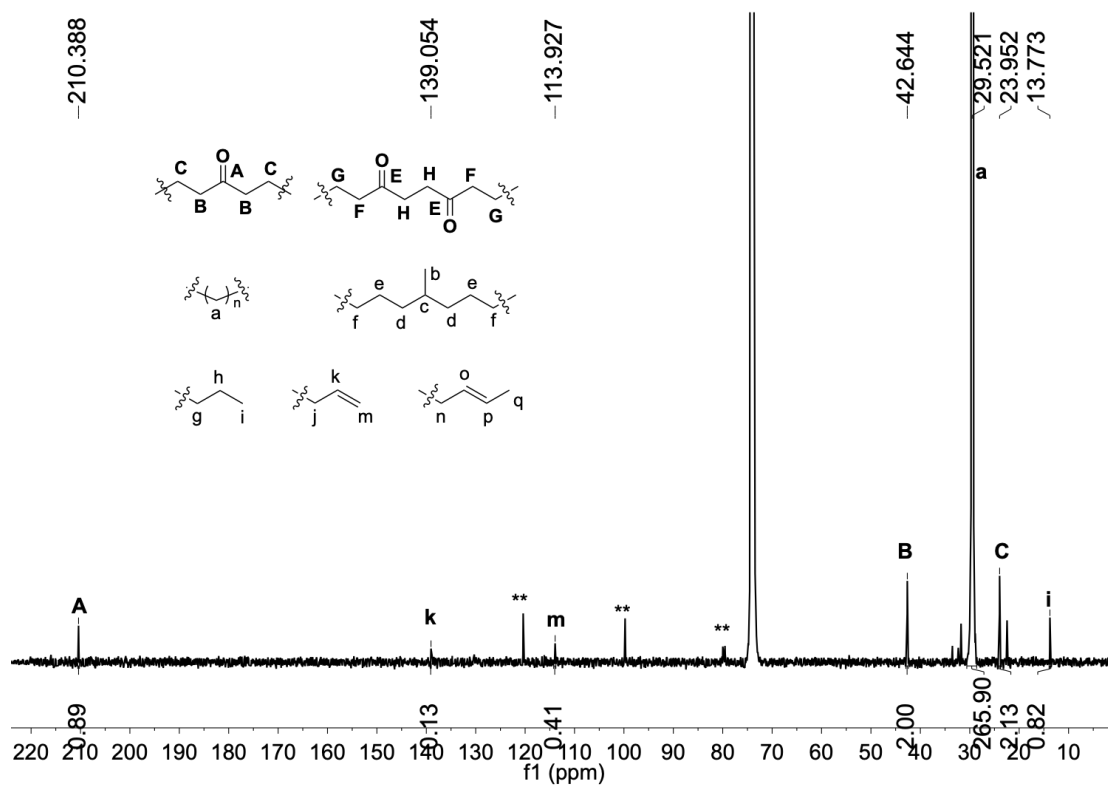

**Supplementary Figure 31.** Quantitative <sup>13</sup>C NMR spectrum of the polymer obtained in Table 1, entry 9 (1,1,2,2-tetrachloroethane-*d*<sub>2</sub>, 126 MHz, 120 °C).



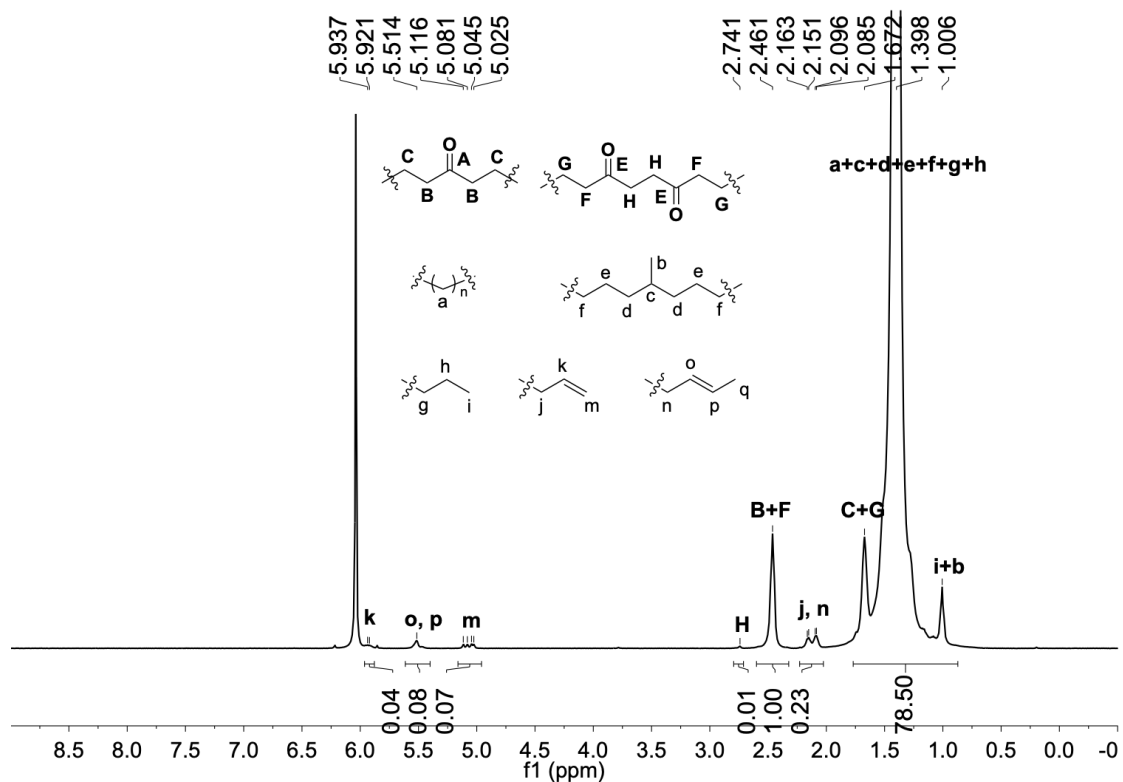

**Supplementary Figure 32.** <sup>1</sup>H NMR spectrum of the polymer obtained in Table 1, entry 10 (1,1,2,2-tetrachloroethane-*d*<sub>2</sub>, 500 MHz, 120 °C).

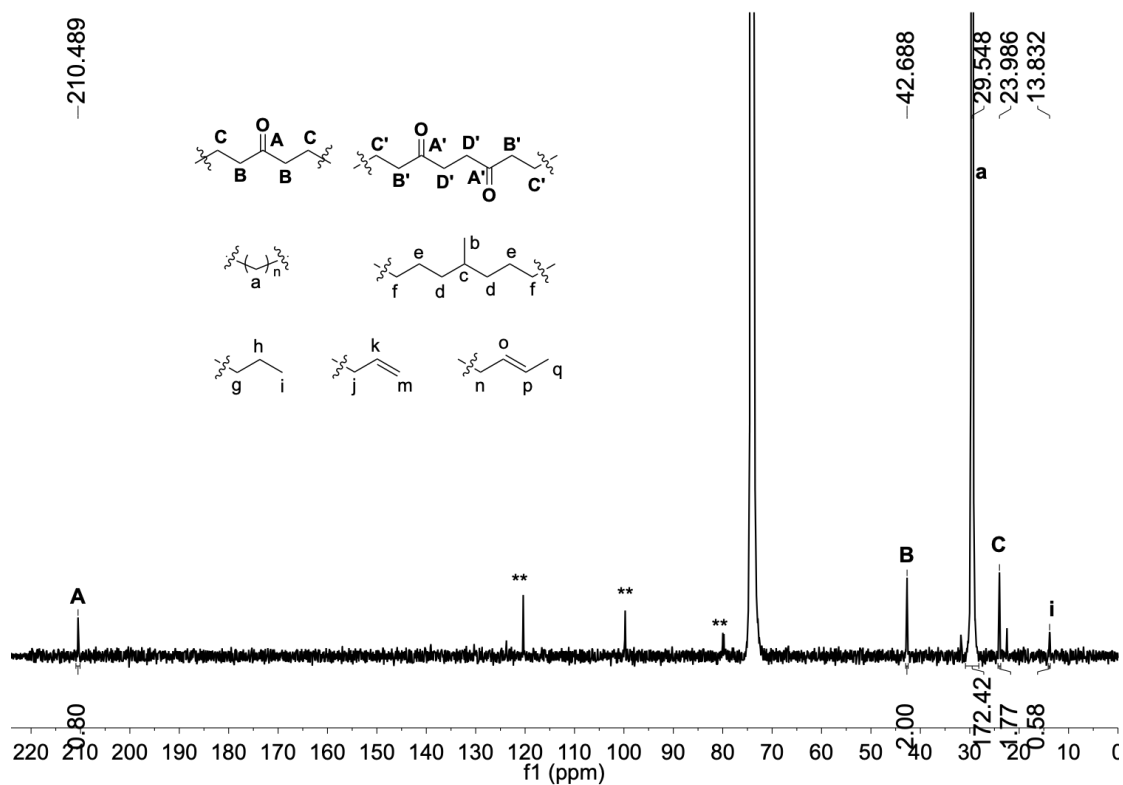

**Supplementary Figure 33.** Quantitative <sup>13</sup>C NMR spectrum of the polymer obtained in Table 1, entry 10 (1,1,2,2-tetrachloroethane-*d*<sub>2</sub>, 126 MHz, 120 °C).

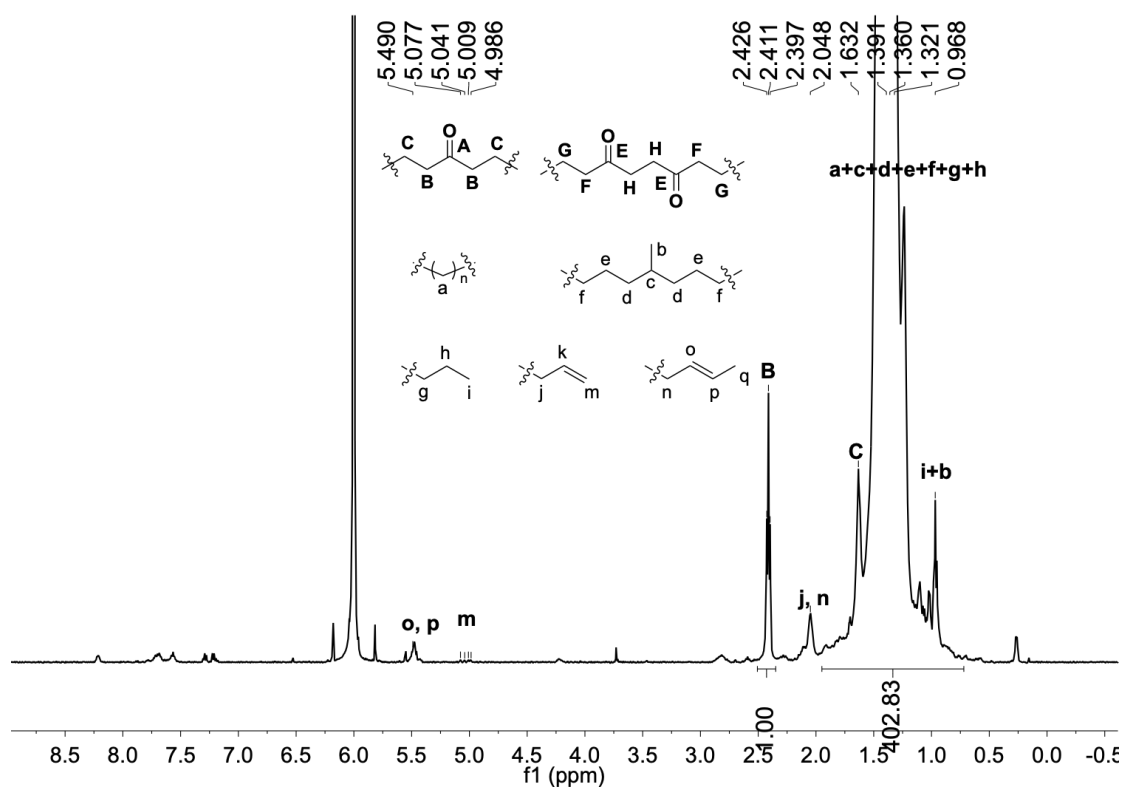

**Supplementary Figure 34.** <sup>1</sup>H NMR spectrum of the polymer obtained in Table 1, entry 11 (1,1,2,2-tetrachloroethane-*d*<sub>2</sub>, 500 MHz, 120 °C).

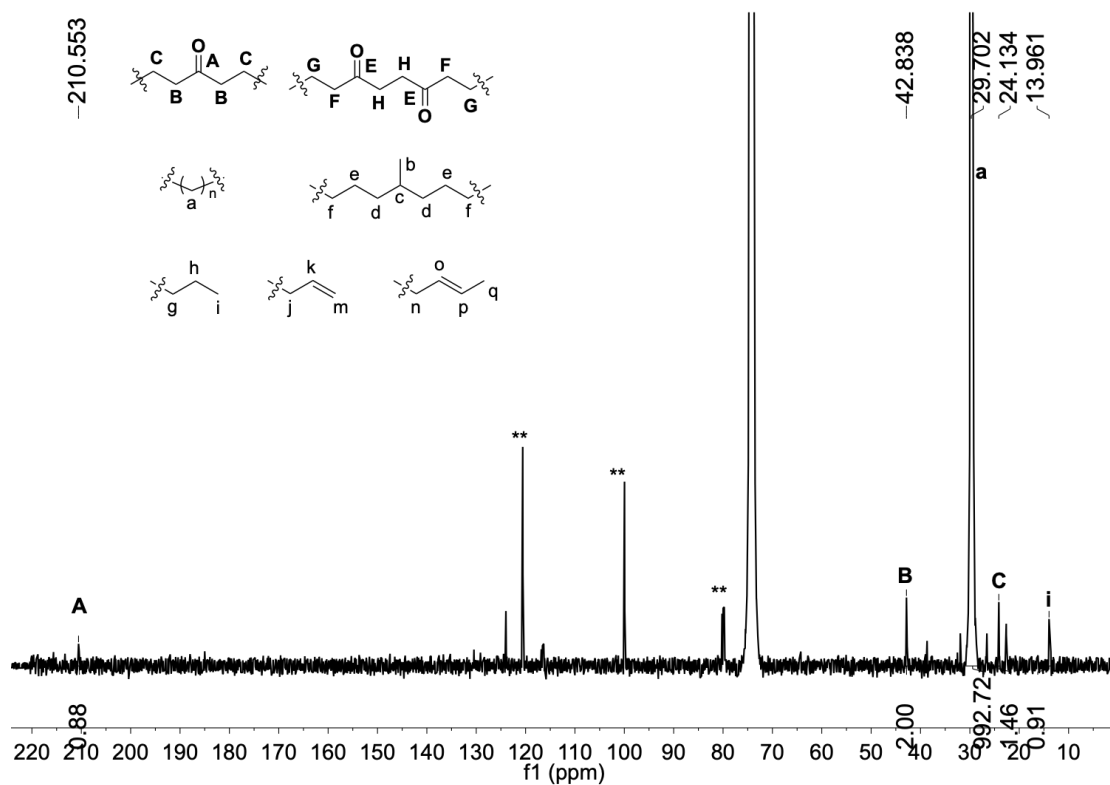

**Supplementary Figure 35.** Quantitative <sup>13</sup>C NMR spectrum of the polymer obtained in Table 1, entry 11 (1,1,2,2-tetrachloroethane-*d*<sub>2</sub>, 126 MHz, 120 °C).

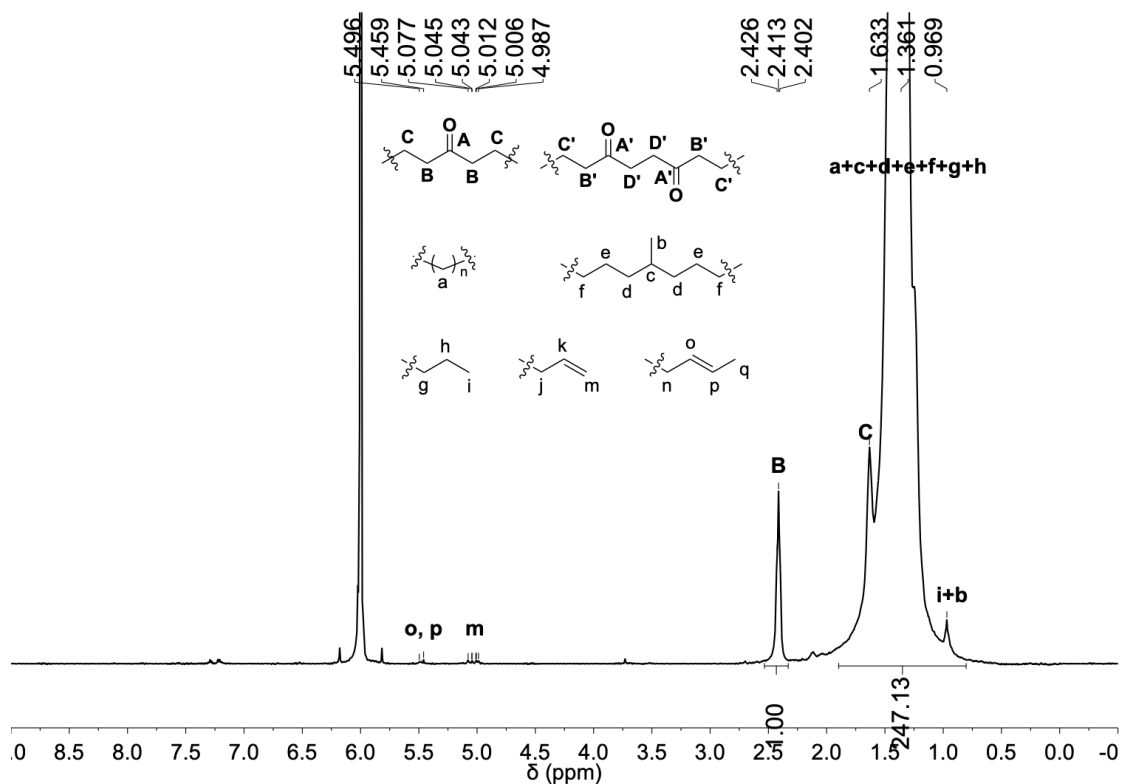

**Supplementary Figure 36.** <sup>1</sup>H NMR spectrum of the polymer obtained in Table 1, entry 12 (1,1,2,2-tetrachloroethane-d<sub>2</sub>, 500 MHz, 120 °C).

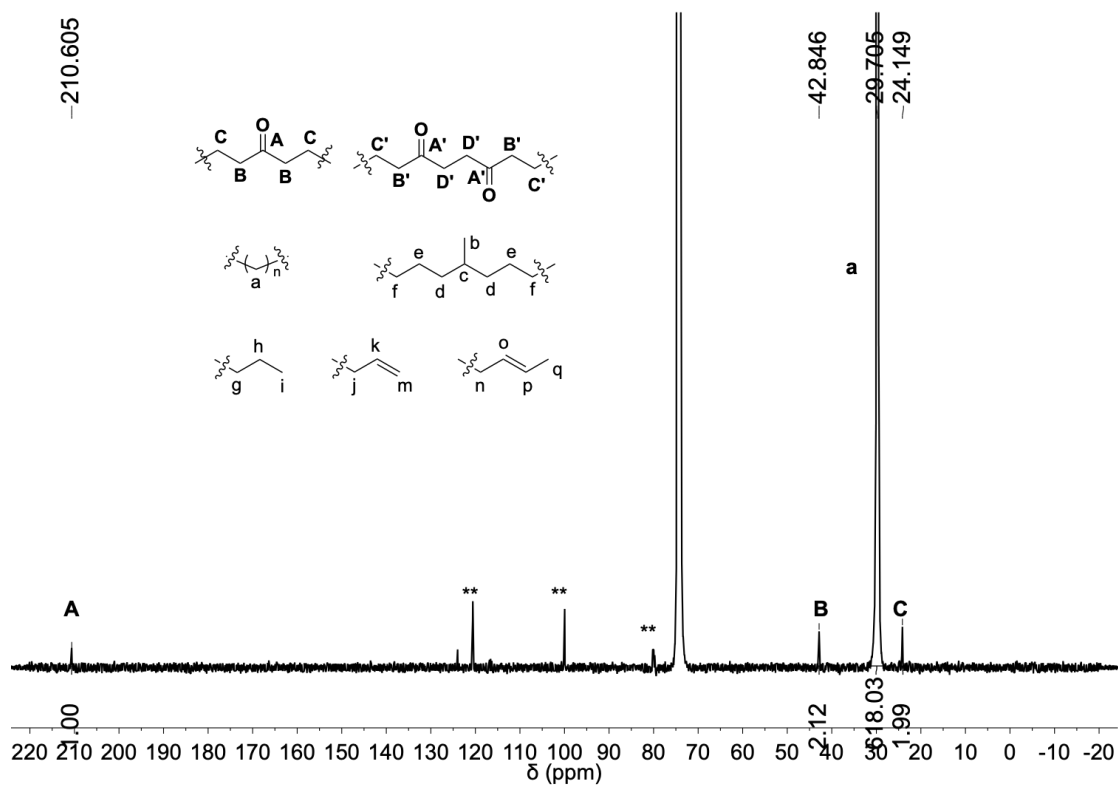

**Supplementary Figure 37.** Quantitative <sup>13</sup>C NMR spectrum of the polymer obtained in Table 1, entry 12 (1,1,2,2-tetrachloroethane-d<sub>2</sub>, 126 MHz, 120 °C).

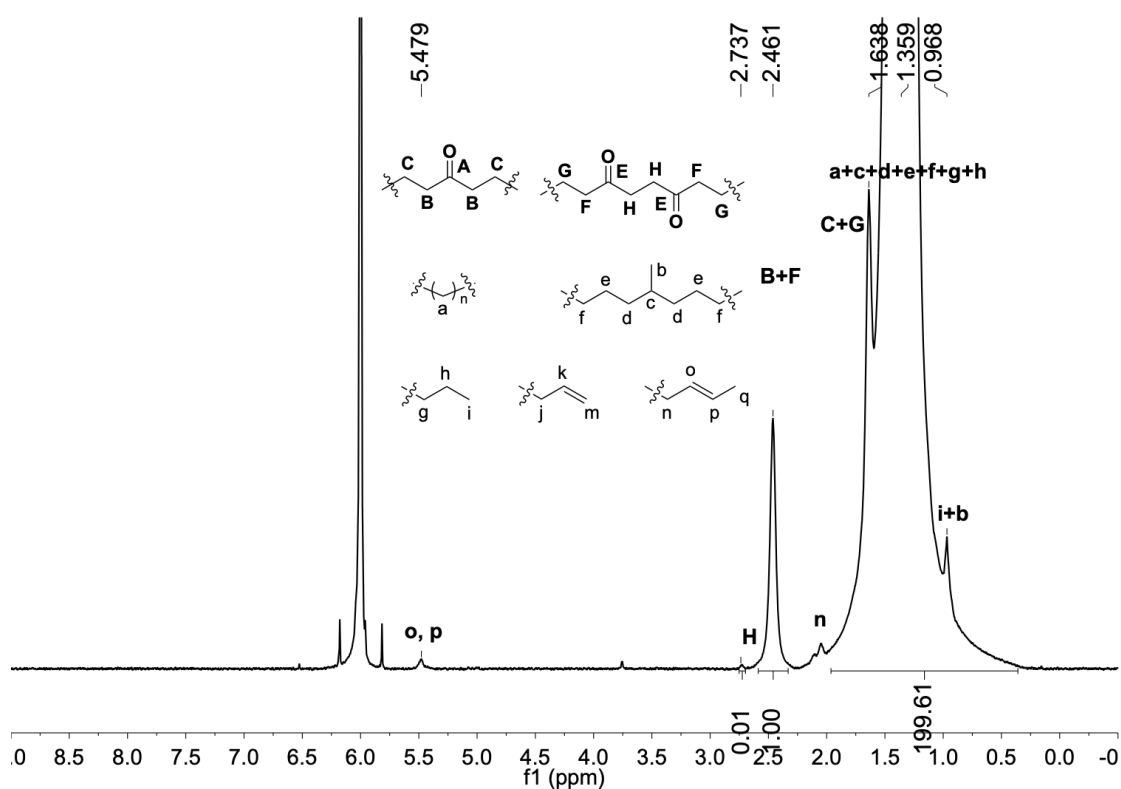

**Supplementary Figure 38.** <sup>1</sup>H NMR spectrum of the polymer obtained in Table 1, entry 13 (1,1,2,2-tetrachloroethane-*d*<sub>2</sub>, 500 MHz, 120 °C).

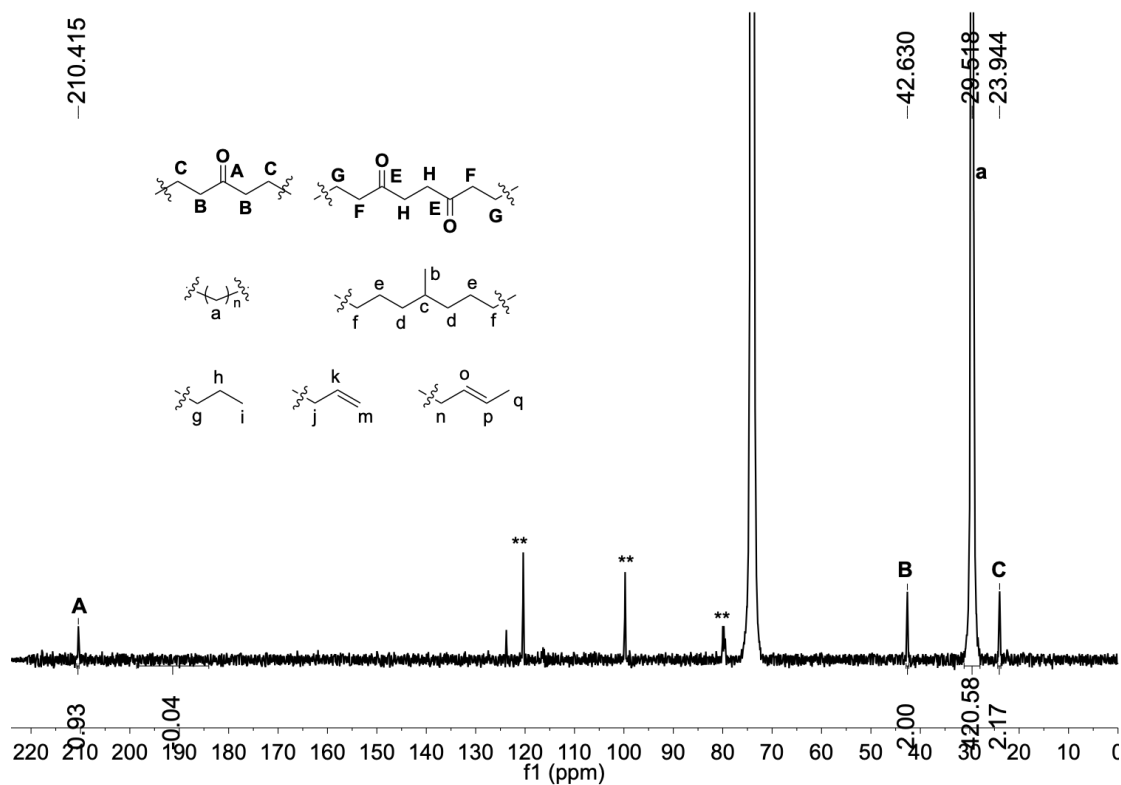

**Supplementary Figure 39.** Quantitative <sup>13</sup>C NMR spectrum of the polymer obtained in Table 1, entry 13 (1,1,2,2-tetrachloroethane-*d*<sub>2</sub>, 126 MHz, 120 °C).

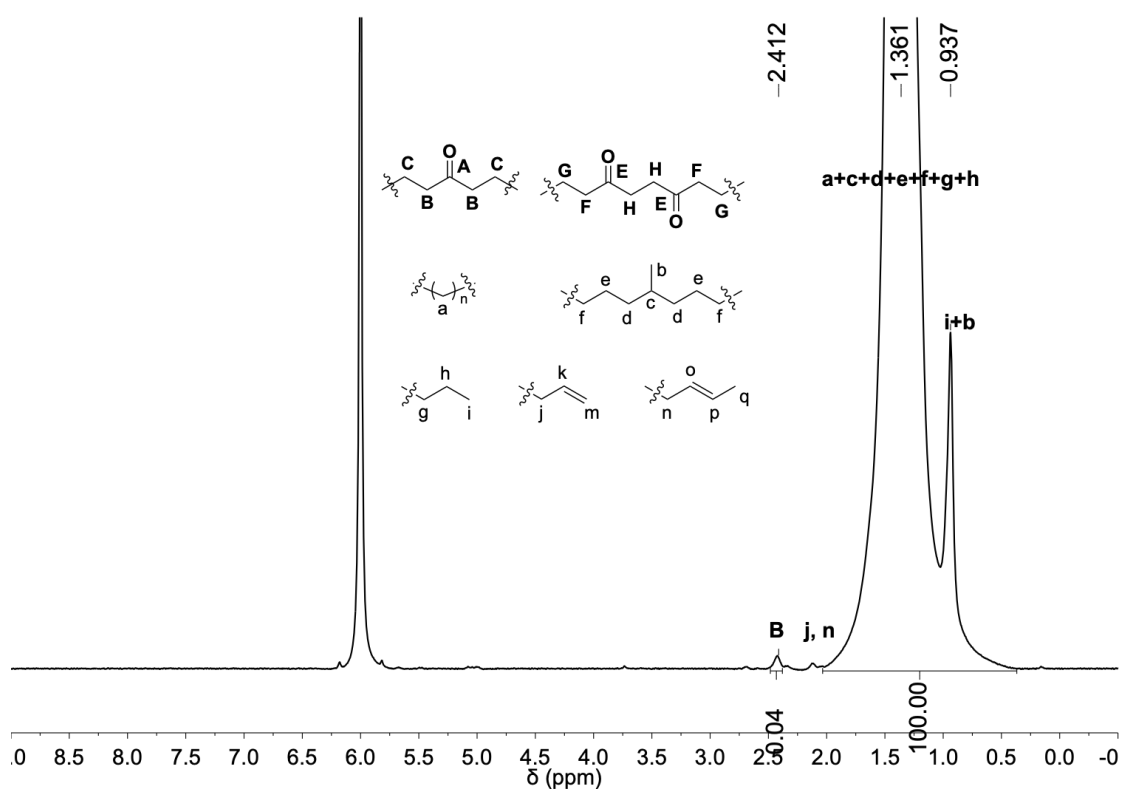

**Supplementary Figure 40.** <sup>1</sup>H NMR spectrum of the polymer obtained in Table 1, entry 14 (1,1,2,2-tetrachloroethane-*d*<sub>2</sub>, 500 MHz, 120 °C).

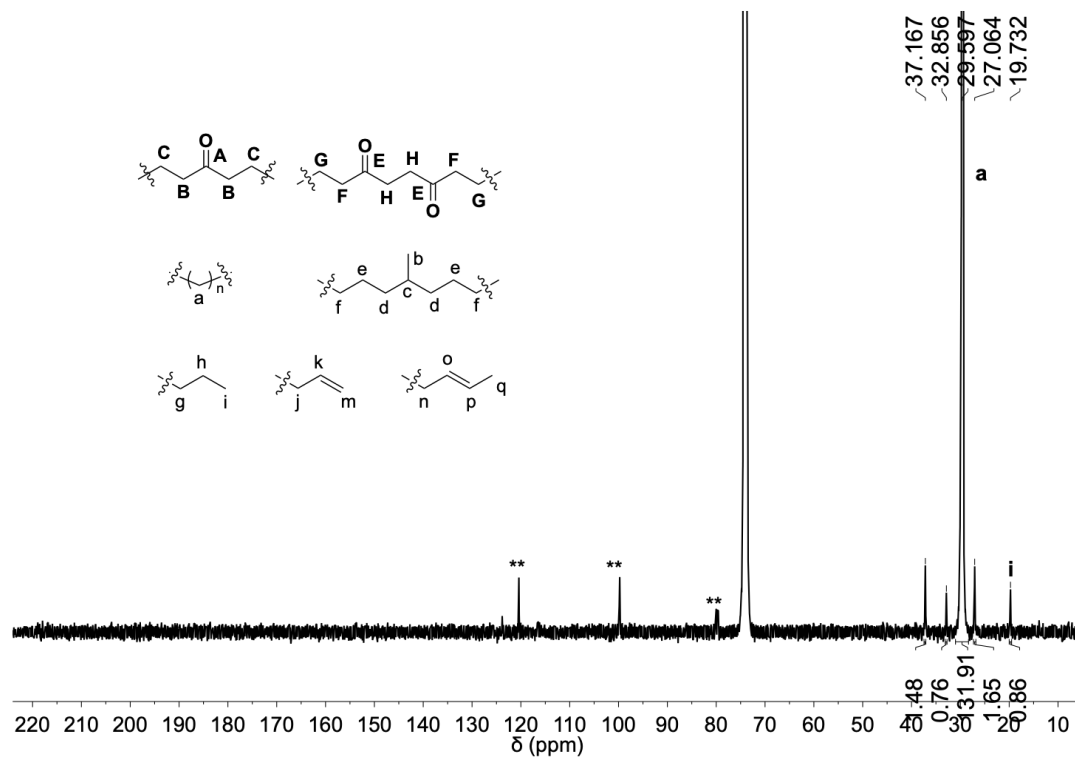

**Supplementary Figure 41.** Quantitative <sup>13</sup>C NMR spectrum of the polymer obtained in Table 1, entry 14 (1,1,2,2-tetrachloroethane-*d*<sub>2</sub>, 126 MHz, 120 °C).

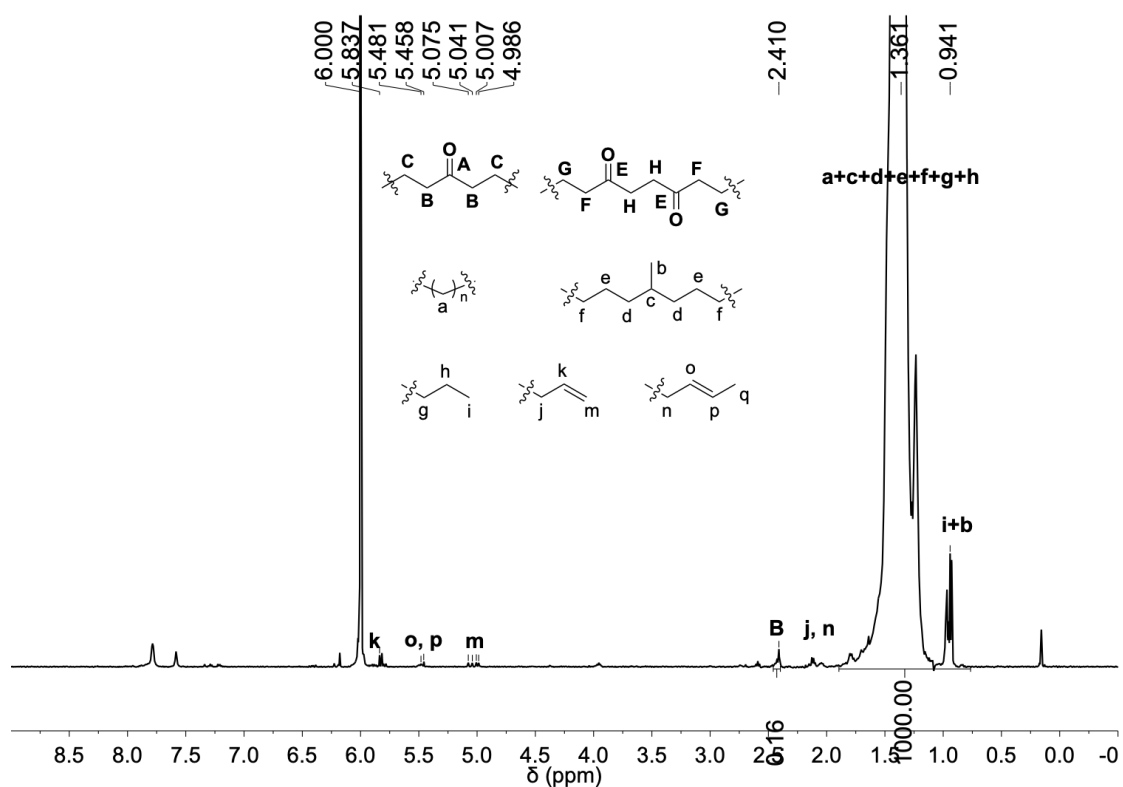

**Supplementary Figure 42.** <sup>1</sup>H NMR spectrum of the polymer obtained in Table 1, entry 15 (1,1,2,2-tetrachloroethane-d<sub>2</sub>, 500 MHz, 120 °C).

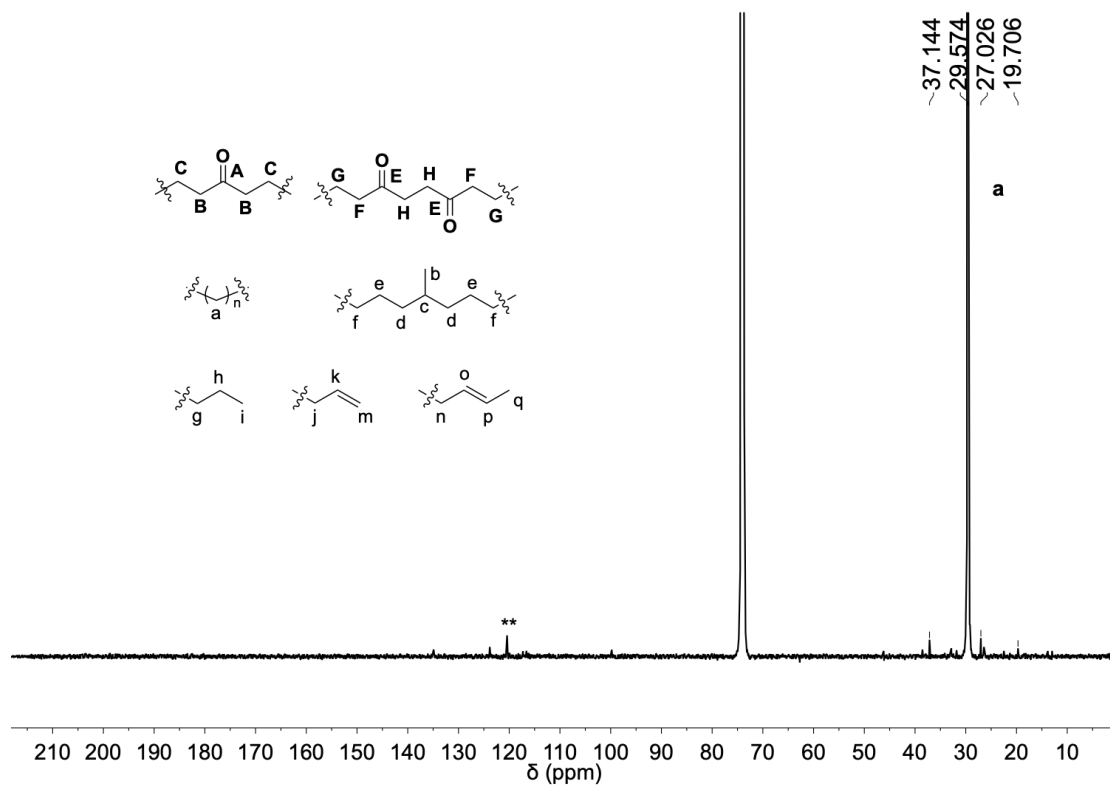

**Supplementary Figure 43.** Quantitative <sup>13</sup>C NMR spectrum of the polymer obtained in Table 1, entry 15 (1,1,2,2-tetrachloroethane-d<sub>2</sub>, 126 MHz, 120 °C).

## Copies of SEC Charts

### Chromatography Report

#### Chromatography Report

|                 |                   |                              |                              |
|-----------------|-------------------|------------------------------|------------------------------|
| Title           |                   | Measurement Date & Time      | 2021/04/17 19:07:46          |
| Sample Name     | ts-1-067-2        | Calculation Date & Time      | 2021/04/19 13:14:26          |
| Database Name   | 2021-04-17.chd    | Acquisition Time [min] [min] | 0.000 - 30.000               |
| Saved File Name | RSLT0779          | Sampling Pitch [ms] [ms]     | 100                          |
| Method Data     | meth8509_standard | Vial Number                  | 3                            |
| Calc. Channel   | RI EXT            | Calculation Method           | Molecular Weight Column test |

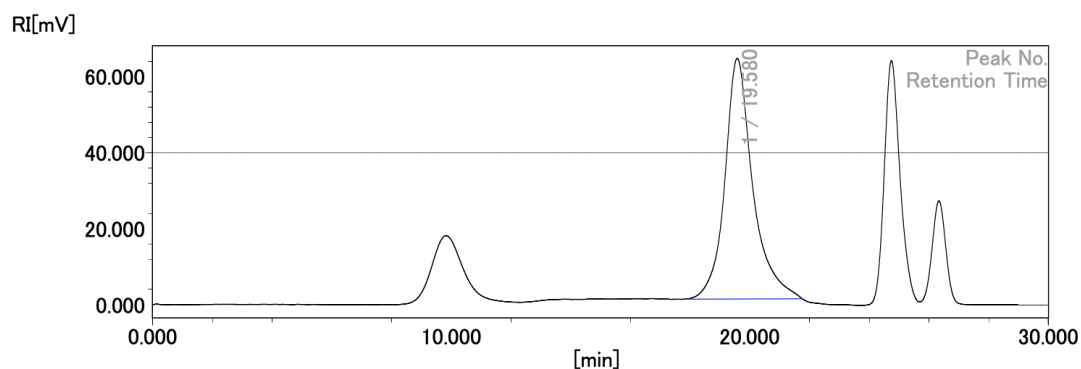

#### Result of Calculation (RI) (RI)

##### Peak 1 Base Peak

|             | [min]  | [mV]   | [mol]       |         |        |
|-------------|--------|--------|-------------|---------|--------|
| Peak Start  | 17.868 | 1.437  | 76,451      | Mn      | 9,213  |
| Peak Top    | 19.580 | 64.901 | 14,160      | Mw      | 14,176 |
| Peak End    | 21.765 | 1.518  | 611         | Mz      | 18,652 |
|             |        |        |             | Mz+1    | 23,708 |
| Height [mV] |        |        | 63.428      | Mv      | 14,176 |
| Area [mV*s] |        |        | 4126.877    | Mp      | 14,395 |
| Area% [%]   |        |        | 100.000     | Mz/Mw   | 1.316  |
| [eta]       |        |        | 14175.88102 | Mw/Mn   | 1.539  |
|             |        |        |             | Mz+1/Mw | 1.672  |

**Supplementary Figure 44.** SEC chart of the polymer obtained in Table 1, entry 1.  $M_n$  (PS) = 9,213 was corrected to  $M_n$  (PE) = 4,000 by universal calibration.

# Chromatography Report

|                 |                   |                              |                              |
|-----------------|-------------------|------------------------------|------------------------------|
| Title           |                   | Measurement Date & Time      | 2021/04/28 17:03:36          |
| Sample Name     | ts-1-071-5        | Calculation Date & Time      | 2021/04/28 19:34:46          |
| Database Name   | 2021-04-28.chd    | Acquisition Time [min] [min] | 10.000 - 30.000              |
| Saved File Name | RSLT0796          | Sampling Pitch [ms] [ms]     | 100                          |
| Method Data     | meth8509_standard | Vial Number                  | 2                            |
| Calc. Channel   | RI EXT            | Calculation Method           | Molecular Weight Column test |

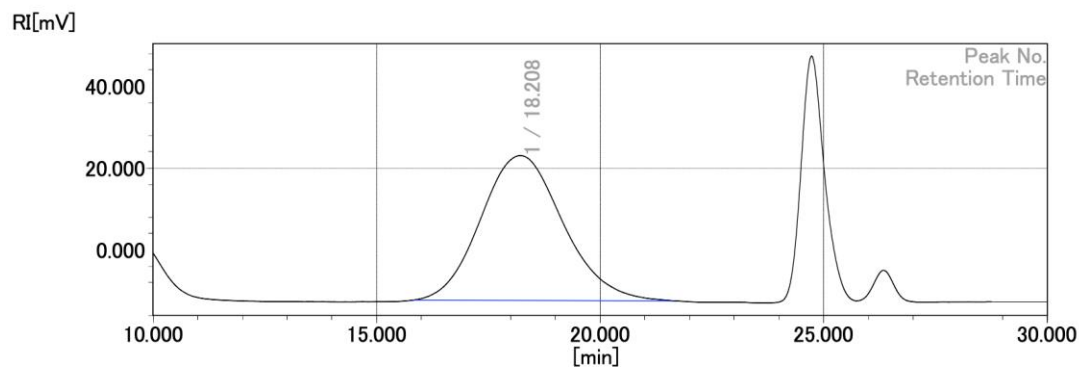

## Result of Calculation (RI) (RI)

Peak 1 Base Peak

|             | [min]  | [mV]    | [mol]       |         |         |
|-------------|--------|---------|-------------|---------|---------|
| Peak Start  | 15.808 | -12.293 | 486,403     | Mn      | 31,734  |
| Peak Top    | 18.208 | 23.059  | 55,819      | Mw      | 67,198  |
| Peak End    | 21.642 | -12.480 | 773         | Mz      | 110,681 |
|             |        |         |             | Mz+1    | 159,986 |
|             |        |         |             | Mv      | 67,198  |
| Height [mV] |        |         | 35.429      | Mp      | 57,315  |
| Area [mV*s] |        |         | 4539.094    | Mz/Mw   | 1.647   |
| Area% [%]   |        |         | 100.000     | Mw/Mn   | 2.118   |
| [eta]       |        |         | 67197.77578 | Mz+1/Mw | 2.381   |

**Supplementary Figure 45.** SEC chart of the polymer obtained in Table 1, entry 2.  $M_n$  (PS) = 31,734 was corrected to  $M_n$  (PE) = 14,000 by universal calibration.



# Chromatography Report

|                 |                   |                              |                              |
|-----------------|-------------------|------------------------------|------------------------------|
| Title           |                   | Measurement Date & Time      | 2021/04/21 22:56:50          |
| Sample Name     | ts-1-071-2        | Calculation Date & Time      | 2021/04/22 09:35:31          |
| Database Name   | 2021-04-21.chd    | Acquisition Time [min] [min] | 10.000 – 30.000              |
| Saved File Name | RSLT0792          | Sampling Pitch [ms] [ms]     | 100                          |
| Method Data     | meth8509_standard | Vial Number                  | 6                            |
| Calc. Channel   | RI EXT            | Calculation Method           | Molecular Weight Column test |

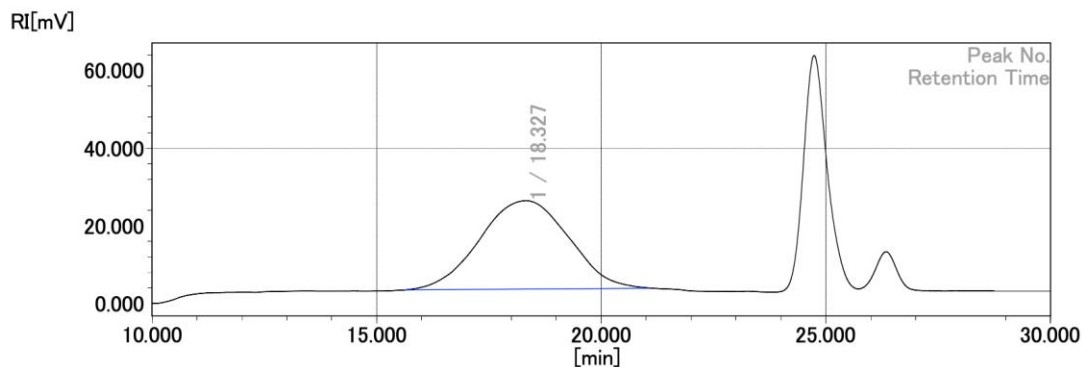

## Result of Calculation (RI) (RI)

### Peak 1 Base Peak

|             | [min]  | [mV]   | [mol]       | Mn      | 34,216  |
|-------------|--------|--------|-------------|---------|---------|
| Peak Start  | 15.613 | 3.416  | 578,680     | Mw      | 69,766  |
| Peak Top    | 18.327 | 26.498 | 49,955      | Mz      | 123,500 |
| Peak End    | 21.103 | 3.886  | 1,948       | Mz+1    | 188,825 |
|             |        |        |             | Mv      | 69,766  |
| Height [mV] |        |        | 22.850      | Mp      | 53,434  |
| Area [mV*s] |        |        | 3142.102    | Mz/Mw   | 1.770   |
| Area% [%]   |        |        | 100.000     | Mw/Mn   | 2.039   |
| [eta]       |        |        | 69766.08813 | Mz+1/Mw | 2.707   |

**Supplementary Figure 46.** SEC chart of the polymer obtained in Table 1, entry 3.  $M_n$  (PS) = 34,216 was corrected to  $M_n$  (PE) = 14,000 by universal calibration.

# Chromatography Report

|                 |                   |                              |                              |
|-----------------|-------------------|------------------------------|------------------------------|
| Title           |                   | Measurement Date & Time      | 2021/05/12 18:44:05          |
| Sample Name     | ts-1-078-2        | Calculation Date & Time      | 2021/05/12 21:20:50          |
| Database Name   | 2021-05-12.chd    | Acquisition Time [min] [min] | 10.000 - 30.000              |
| Saved File Name | RSLT0814          | Sampling Pitch [ms] [ms]     | 100                          |
| Method Data     | meth8509_standard | Vial Number                  | 2                            |
| Calc. Channel   | RI EXT            | Calculation Method           | Molecular Weight Column test |

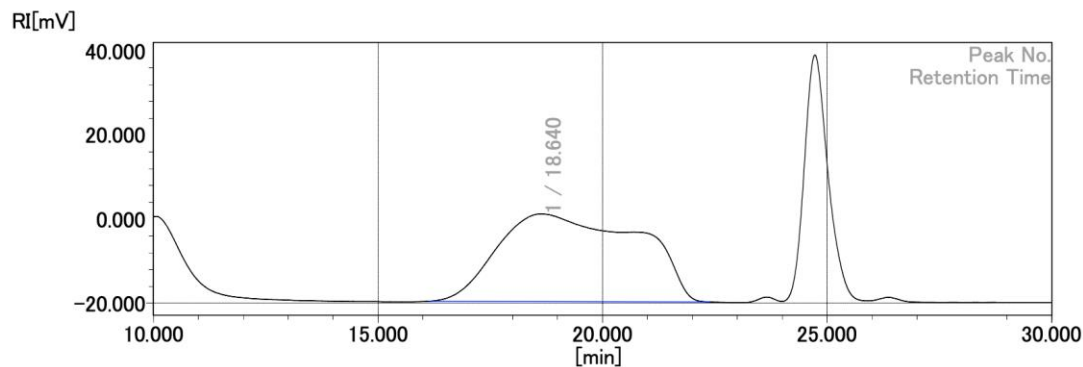

## Result of Calculation (RI) (RI)

### Peak 1 Base Peak

|             | [min]  | [mV]    | [mol]       | Mn      | 5,378   |
|-------------|--------|---------|-------------|---------|---------|
| Peak Start  | 16.127 | -19.538 | 366,177     | Mw      | 33,265  |
| Peak Top    | 18.640 | 1.257   | 37,054      | Mz      | 80,773  |
| Peak End    | 22.377 | -19.712 | 163         | Mz+1    | 121,918 |
|             |        |         |             | Mv      | 33,265  |
| Height [mV] |        |         | 20.865      | Mp      | 40,796  |
| Area [mV*s] |        |         | 4570.318    | Mz/Mw   | 2.428   |
| Area% [%]   |        |         | 100.000     | Mw/Mn   | 6.186   |
| [eta]       |        |         | 33264.72786 | Mz+1/Mw | 3.665   |

**Supplementary Figure 47.** SEC chart of the polymer obtained in Table 1, entry 5.  $M_n$  (PS) = 5,378 was corrected to  $M_n$  (PE) = 3,400 by universal calibration.

# Chromatography Report

|                 |                   |                              |                              |
|-----------------|-------------------|------------------------------|------------------------------|
| Title           |                   | Measurement Date & Time      | 2021/05/12 18:14:04          |
| Sample Name     | ts-1-077-1        | Calculation Date & Time      | 2021/05/12 21:20:30          |
| Database Name   | 2021-05-12.chd    | Acquisition Time [min] [min] | 10.000 - 30.000              |
| Saved File Name | RSLT0813          | Sampling Pitch [ms] [ms]     | 100                          |
| Method Data     | meth8509_standard | Vial Number                  | 1                            |
| Calc. Channel   | RI EXT            | Calculation Method           | Molecular Weight Column test |

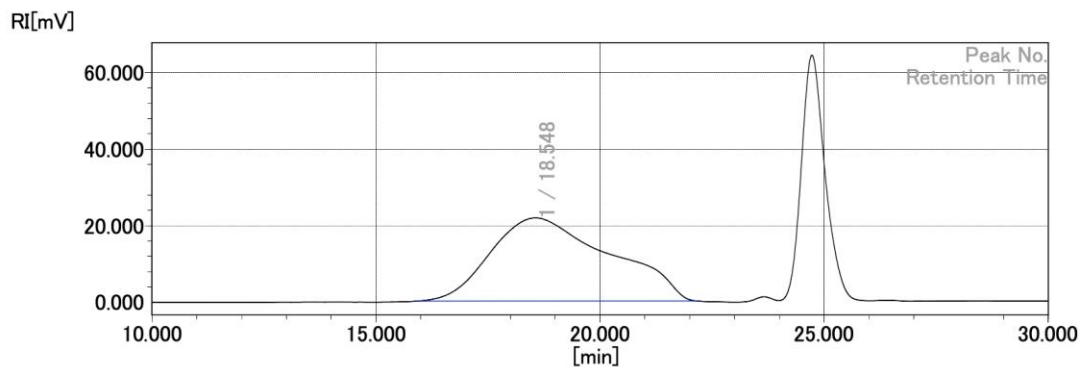

## Result of Calculation (RI) (RI)

### Peak 1 Base Peak

|             | [min]  | [mV]   | [mol]       | Mn      | 7,736   |
|-------------|--------|--------|-------------|---------|---------|
| Peak Start  | 15.907 | 0.304  | 445,578     | Mw      | 41,711  |
| Peak Top    | 18.548 | 22.053 | 40,471      | Mz      | 92,320  |
| Peak End    | 22.182 | 0.317  | 256         | Mz+1    | 141,952 |
|             |        |        |             | Mv      | 41,711  |
| Height [mV] |        |        | 21.744      | Mp      | 43,272  |
| Area [mV*s] |        |        | 4032.161    | Mz/Mw   | 2.213   |
| Area% [%]   |        |        | 100.000     | Mw/Mn   | 5.392   |
| [eta]       |        |        | 41710.63417 | Mz+1/Mw | 3.403   |

**Supplementary Figure 48.** SEC chart of the polymer obtained in Table 1, entry 6.  $M_n$  (PS) = 7,736 was corrected to  $M_n$  (PE) = 2,400 by universal calibration.

# Chromatography Report

|                 |                   |                              |                              |
|-----------------|-------------------|------------------------------|------------------------------|
| Title           |                   | Measurement Date & Time      | 2021/04/21 23:26:50          |
| Sample Name     | ts-1-071-3        | Calculation Date & Time      | 2021/04/22 09:35:10          |
| Database Name   | 2021-04-21.chd    | Acquisition Time [min] [min] | 10.000 - 30.000              |
| Saved File Name | RSLT0793          | Sampling Pitch [ms] [ms]     | 100                          |
| Method Data     | meth8509_standard | Vial Number                  | 7                            |
| Calc. Channel   | RI EXT            | Calculation Method           | Molecular Weight Column test |

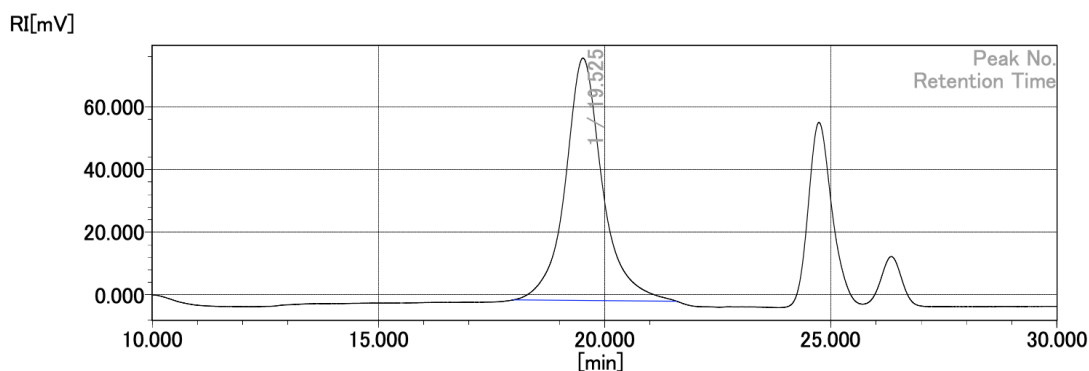

## Result of Calculation (RI) (RI)

Peak 1 Base Peak

|             | [min]  | [mV]   | [mol]       |         |        |
|-------------|--------|--------|-------------|---------|--------|
| Peak Start  | 17.990 | -1.618 | 68,357      | Mn      | 11,496 |
| Peak Top    | 19.525 | 75.553 | 15,035      | Mw      | 15,681 |
| Peak End    | 21.593 | -2.076 | 845         | Mz      | 19,582 |
|             |        |        |             | Mz+1    | 24,040 |
|             |        |        |             | Mv      | 15,681 |
| Height [mV] |        |        | 77.366      | Mp      | 15,282 |
| Area [mV*s] |        |        | 4426.005    | Mz/Mw   | 1.249  |
| Area% [%]   |        |        | 100.000     | Mw/Mn   | 1.364  |
| [eta]       |        |        | 15680.83538 | Mz+1/Mw | 1.533  |

**Supplementary Figure 49.** SEC chart of the polymer obtained in Table 1, entry 7.  $M_n$  (PS) = 11,496 was corrected to  $M_n$  (PE) = 5,000 by universal calibration.

# Chromatography Report

|                 |                   |                              |                              |
|-----------------|-------------------|------------------------------|------------------------------|
| Title           |                   | Measurement Date & Time      | 2021/04/21 23:56:51          |
| Sample Name     | ts-1-071-4        | Calculation Date & Time      | 2021/04/22 09:34:47          |
| Database Name   | 2021-04-21.chd    | Acquisition Time [min] [min] | 10.000 - 30.000              |
| Saved File Name | RSLT0794          | Sampling Pitch [ms] [ms]     | 100                          |
| Method Data     | meth8509_standard | Vial Number                  | 8                            |
| Calc. Channel   | RI EXT            | Calculation Method           | Molecular Weight Column test |

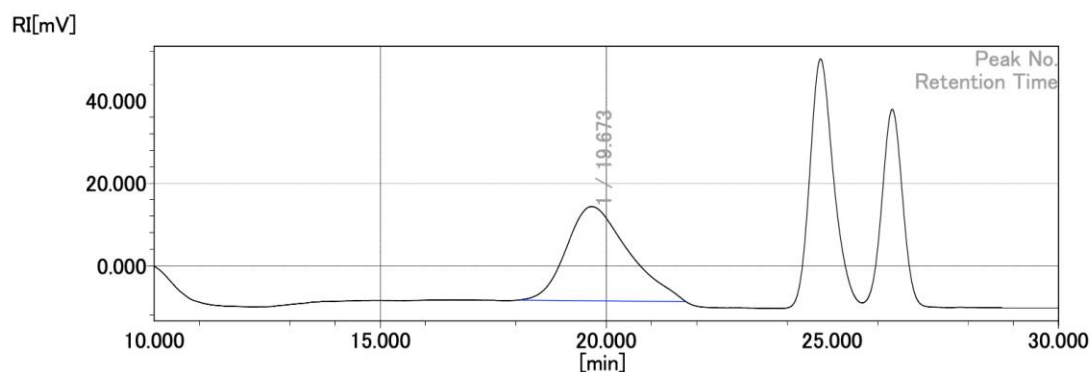

## Result of Calculation (RI) (RI)

Peak 1 Base Peak

|             | [min]  | [mV]   | [mol]       | Mn      | 6,528  |
|-------------|--------|--------|-------------|---------|--------|
| Peak Start  | 18.063 | -8.376 | 63.877      | Mw      | 12,317 |
| Peak Top    | 19.673 | 14.319 | 12.772      | Mz      | 18,131 |
| Peak End    | 21.765 | -8.755 | 611         | Mz+1    | 23,555 |
|             |        |        |             | Mv      | 12,317 |
| Height [mV] |        |        | 22.860      | Mp      | 13,601 |
| Area [mV*s] |        |        | 2180.267    | Mz/Mw   | 1.472  |
| Area% [%]   |        |        | 100.000     | Mw/Mn   | 1.887  |
| [eta]       |        |        | 12316.92713 | Mz+1/Mw | 1.912  |

**Supplementary Figure 50.** SEC chart of the polymer obtained in Table 1, entry 8.  $M_n$  (PS) = 6,528 was corrected to  $M_n$  (PE) = 2,900 by universal calibration.

# Chromatography Report

|                 |                |                              |                              |
|-----------------|----------------|------------------------------|------------------------------|
| Title           |                | Measurement Date & Time      | 2021/04/17 19:37:47          |
| Sample Name     | ts-1-067-3     | Calculation Date & Time      | 2021/04/19 13:06:25          |
| Database Name   | 2021-04-17.chd | Acquisition Time [min] [min] | 0.000 – 30.000               |
| Saved File Name | RSLT0780       | Sampling Pitch [ms] [ms]     | 100                          |
| Method Data     | temp           | Vial Number                  | 4                            |
| Calc. Channel   | RI EXT         | Calculation Method           | Molecular Weight Column test |

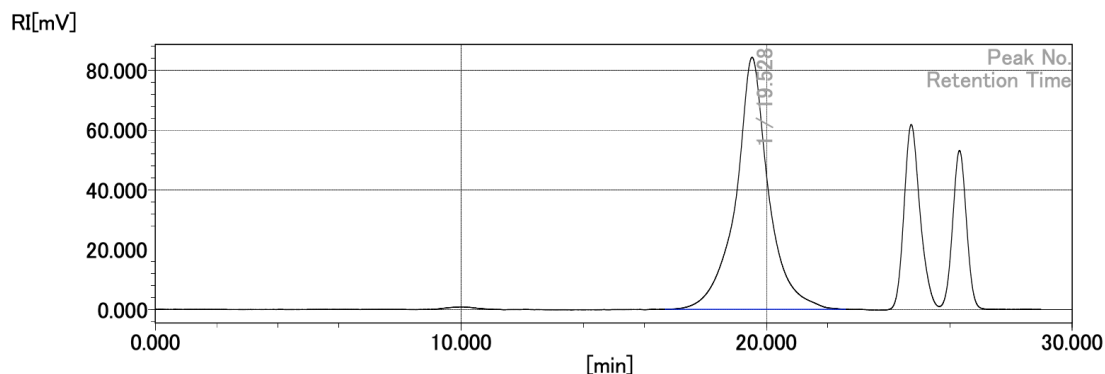

## Result of Calculation (RI) (RI)

Peak 1 Base Peak

|             | [min]  | [mV]   | [mol]       | Mn      | 9,393  |
|-------------|--------|--------|-------------|---------|--------|
| Peak Start  | 16.692 | 0.069  | 221,058     | Mw      | 18,204 |
| Peak Top    | 19.528 | 84.347 | 14,981      | Mz      | 29,675 |
| Peak End    | 22.573 | 0.052  | 100         | Mz+1    | 48,709 |
|             |        |        |             | Mv      | 18,204 |
| Height [mV] |        |        | 84.286      | Mp      | 15,420 |
| Area [mV*s] |        |        | 6297.260    | Mz/Mw   | 1.630  |
| Area% [%]   |        |        | 100.000     | Mw/Mn   | 1.938  |
| [eta]       |        |        | 18204.14897 | Mz+1/Mw | 2.676  |

**Supplementary Figure 51.** SEC chart of the polymer obtained in Table 1, entry 9.  $M_n$  (PS) = 9,393 was corrected to  $M_n$  (PE) = 4,100 by universal calibration.

# Chromatography Report

|                 |                   |                              |                              |
|-----------------|-------------------|------------------------------|------------------------------|
| Title           |                   | Measurement Date & Time      | 2021/04/09 19:13:47          |
| Sample Name     | ts-1-061-3        | Calculation Date & Time      | 2021/04/09 19:30:22          |
| Database Name   | 2021-04-09.chd    | Acquisition Time [min] [min] | 10.000 - 30.000              |
| Saved File Name | RSLT0773          | Sampling Pitch [ms] [ms]     | 100                          |
| Method Data     | meth8509_standard | Vial Number                  | 5                            |
| Calc. Channel   | RI EXT            | Calculation Method           | Molecular Weight Column test |

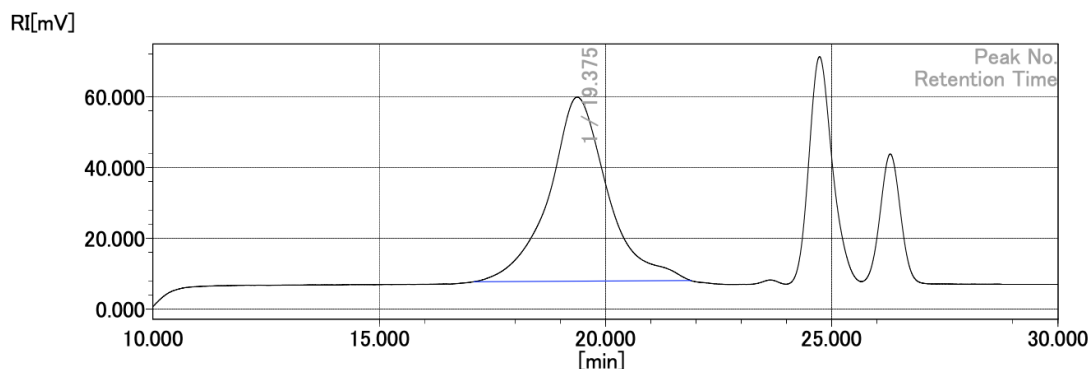

## Result of Calculation (RI) (RI)

|                  |        |        |             |         |        |
|------------------|--------|--------|-------------|---------|--------|
| Peak 1 Base Peak |        |        |             |         |        |
|                  | [min]  | [mV]   | [mol]       | Mn      | 10,331 |
| Peak Start       | 17.095 | 7.700  | 154,019     | Mw      | 21,106 |
| Peak Top         | 19.375 | 59.854 | 17,658      | Mz      | 34,412 |
| Peak End         | 21.888 | 8.054  | 478         | Mz+1    | 51,812 |
|                  |        |        |             | Mv      | 21,106 |
| Height [mV]      |        |        | 51.986      | Mp      | 18,228 |
| Area [mV*s]      |        |        | 4680.226    | Mz/Mw   | 1.630  |
| Area% [%]        |        |        | 100.000     | Mw/Mn   | 2.043  |
| [eta]            |        |        | 21106.27233 | Mz+1/Mw | 2.455  |

**Supplementary Figure 52.** SEC chart of the polymer obtained in Table 1, entry 10.  $M_n$  (PS) = 10,331 was corrected to  $M_n$  (PE) = 4,500 by universal calibration.

# Chromatography Report

|                 |                |                              |                              |
|-----------------|----------------|------------------------------|------------------------------|
| Title           |                | Measurement Date & Time      | 2021/04/17 19:37:47          |
| Sample Name     | ts-1-067-3     | Calculation Date & Time      | 2021/04/19 13:06:25          |
| Database Name   | 2021-04-17.chd | Acquisition Time [min] [min] | 0.000 - 30.000               |
| Saved File Name | RSLT0780       | Sampling Pitch [ms] [ms]     | 100                          |
| Method Data     | temp           | Vial Number                  | 4                            |
| Calc. Channel   | RI EXT         | Calculation Method           | Molecular Weight Column test |

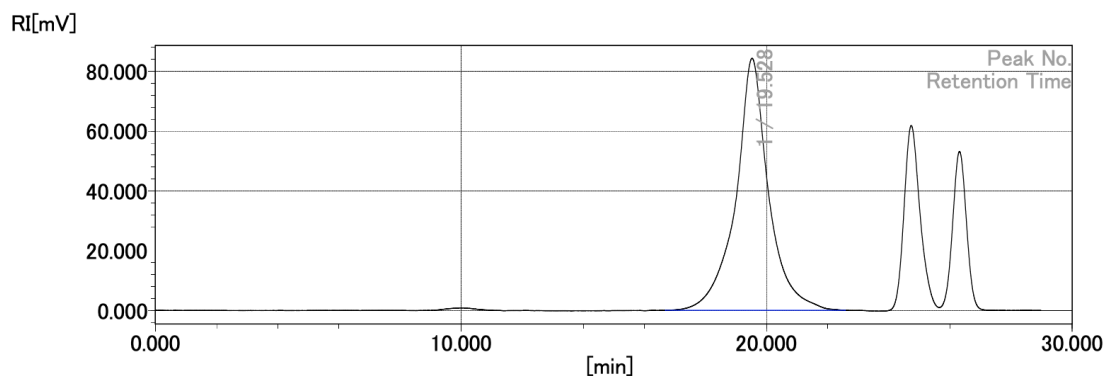

## Result of Calculation (RI) (RI)

Peak 1 Base Peak

|             | [min]  | [mV]   | [mol]       | Mn      | 9,393  |
|-------------|--------|--------|-------------|---------|--------|
| Peak Start  | 16.692 | 0.069  | 221,058     | Mw      | 18,204 |
| Peak Top    | 19.528 | 84.347 | 14,981      | Mz      | 29,675 |
| Peak End    | 22.573 | 0.052  | 100         | Mz+1    | 48,709 |
|             |        |        |             | Mv      | 18,204 |
| Height [mV] |        |        | 84.286      | Mp      | 15,420 |
| Area [mV*s] |        |        | 6297.260    | Mz/Mw   | 1.630  |
| Area% [%]   |        |        | 100.000     | Mw/Mn   | 1.938  |
| [eta]       |        |        | 18204.14897 | Mz+1/Mw | 2.676  |

**Supplementary Figure 53.** SEC chart of the polymer obtained in Table 1, entry 11.  $M_n$  (PS) = 9,393 was corrected to  $M_n$  (PE) = 26,000 by universal calibration.



# Chromatography Report

|                 |                   |                              |                              |
|-----------------|-------------------|------------------------------|------------------------------|
| Title           |                   | Measurement Date & Time      | 2021/04/09 18:43:46          |
| Sample Name     | ts-1-061-2        | Calculation Date & Time      | 2021/07/13 19:24:18          |
| Database Name   | 2021-04-09.chd    | Acquisition Time [min] [min] | 10.000 – 30.000              |
| Saved File Name | RSLT0772          | Sampling Pitch [ms] [ms]     | 100                          |
| Method Data     | meth8509_standard | Vial Number                  | 4                            |
| Calc. Channel   | RI EXT            | Calculation Method           | Molecular Weight Column test |

RI

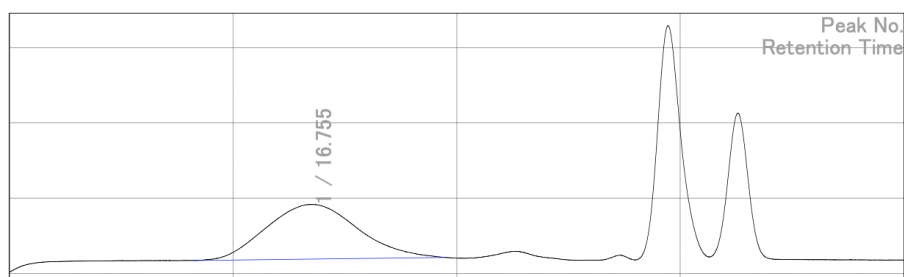

## Result of Calculation (RI) (RI)

Peak 1 Base Peak

|             | [min]  | [mV]   | [mol]        | Mn      | 136,010 |
|-------------|--------|--------|--------------|---------|---------|
| Peak Start  | 14.118 | 3.435  | 2,153,247    | Mw      | 270,908 |
| Peak Top    | 16.755 | 18.361 | 208,882      | Mz      | 460,049 |
| Peak End    | 19.780 | 4.249  | 11,327       | Mz+1    | 672,511 |
|             |        |        |              | Mv      | 270,908 |
| Height [mV] |        |        | 14.547       | Mp      | 208,882 |
| Area [mV*s] |        |        | 2068.328     | Mz/Mw   | 1.698   |
| Area% [%]   |        |        | 100.000      | Mw/Mn   | 1.992   |
| [eta]       |        |        | 270908.30659 | Mz+1/Mw | 2.482   |

**Supplementary Figure 54.** SEC chart of the polymer obtained in Table 1, entry 12.  $M_n$  (PS) = 136,010 was corrected to  $M_n$  (PE) = 58,000 by universal calibration.

# Chromatography Report

|                 |                   |                              |                              |
|-----------------|-------------------|------------------------------|------------------------------|
| Title           |                   | Measurement Date & Time      | 2021/04/21 22:26:49          |
| Sample Name     | ts-1-070-2        | Calculation Date & Time      | 2021/04/22 09:35:54          |
| Database Name   | 2021-04-21.chd    | Acquisition Time [min] [min] | 10.000 - 30.000              |
| Saved File Name | RSLT0791          | Sampling Pitch [ms] [ms]     | 100                          |
| Method Data     | meth8509_standard | Vial Number                  | 5                            |
| Calc. Channel   | RI EXT            | Calculation Method           | Molecular Weight Column test |

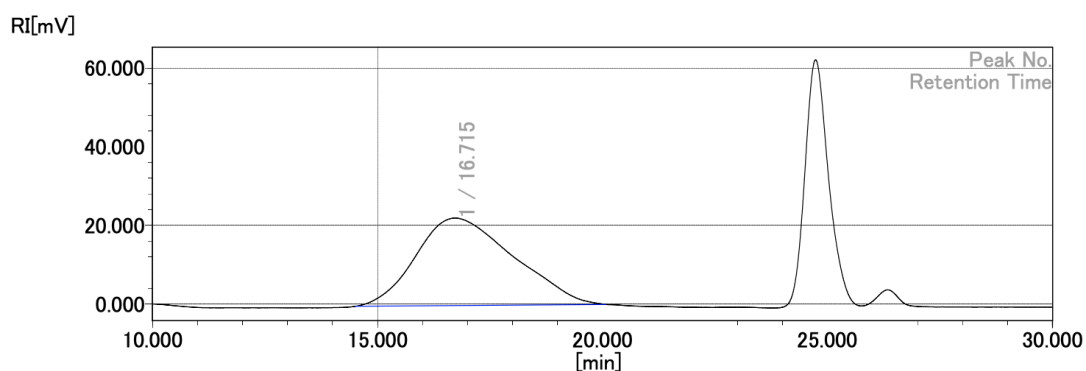

## Result of Calculation (RI) (RI)

Peak 1 Base Peak

|             | [min]  | [mV]   | [mol]        | Mn      | 102,928 |
|-------------|--------|--------|--------------|---------|---------|
| Peak Start  | 14.510 | -0.607 | 1,533,779    | Mw      | 226,066 |
| Peak Top    | 16.715 | 21.846 | 216,492      | Mz      | 391,784 |
| Peak End    | 20.073 | -0.156 | 8,034        | Mz+1    | 563,689 |
|             |        |        |              | Mv      | 226,066 |
| Height [mV] |        |        | 22.274       | Mp      | 216,492 |
| Area [mV*s] |        |        | 3353.343     | Mz/Mw   | 1.733   |
| Area% [%]   |        |        | 100.000      | Mw/Mn   | 2.196   |
| [eta]       |        |        | 226066.49411 | Mz+1/Mw | 2.493   |

**Supplementary Figure 55.** SEC chart of the polymer obtained in Table 1, entry 13.  $M_n$  (PS) = 102,928 was corrected to  $M_n$  (PE) = 44,000 by universal calibration.

# Chromatography Report

|                 |                   |                              |                              |
|-----------------|-------------------|------------------------------|------------------------------|
| Title           |                   | Measurement Date & Time      | 2021/04/17 20:07:48          |
| Sample Name     | ts-1-064-1        | Calculation Date & Time      | 2021/04/19 13:15:52          |
| Database Name   | 2021-04-17.chd    | Acquisition Time [min] [min] | 0.000 – 30.000               |
| Saved File Name | RSLT0781          | Sampling Pitch [ms] [ms]     | 100                          |
| Method Data     | meth8509_standard | Vial Number                  | 5                            |
| Calc. Channel   | RI EXT            | Calculation Method           | Molecular Weight Column test |

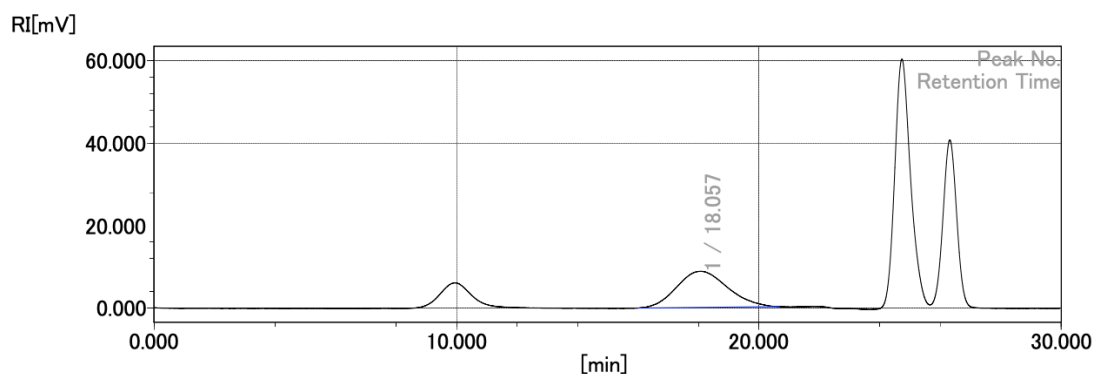

## Result of Calculation (RI) (RI)

Peak 1 Base Peak

|             | [min]  | [mV]   | [mol]       | Mn      | 42.807  |
|-------------|--------|--------|-------------|---------|---------|
| Peak Start  | 15.993 | -0.020 | 412,435     | Mw      | 72,516  |
| Peak Top    | 18.057 | 8.911  | 64,273      | Mz      | 108,364 |
| Peak End    | 20.662 | 0.357  | 3,749       | Mz+1    | 146,667 |
|             |        |        |             | Mv      | 72,516  |
| Height [mV] |        |        | 8.764       | Mp      | 65,980  |
| Area [mV*s] |        |        | 1017.231    | Mz/Mw   | 1.494   |
| Area% [%]   |        |        | 100.000     | Mw/Mn   | 1.694   |
| [eta]       |        |        | 72516.32591 | Mz+1/Mw | 2.023   |

**Supplementary Figure 56.** SEC chart of the polymer obtained in Table 1, entry 14.  $M_n$  (PS) = 42807 was corrected to  $M_n$  (PE) = 17,000 by universal calibration.

# Chromatography Report

|                 |                   |                              |                              |
|-----------------|-------------------|------------------------------|------------------------------|
| Title           |                   | Measurement Date & Time      | 2021/04/21 20:26:45          |
| Sample Name     | FS1042            | Calculation Date & Time      | 2021/07/13 19:41:13          |
| Database Name   | 2021-04-21.chd    | Acquisition Time [min] [min] | 10.000 – 30.000              |
| Saved File Name | RSLT0787          | Sampling Pitch [ms] [ms]     | 100                          |
| Method Data     | meth8509_standard | Vial Number                  | 1                            |
| Calc. Channel   | RI EXT            | Calculation Method           | Molecular Weight Column test |

RI

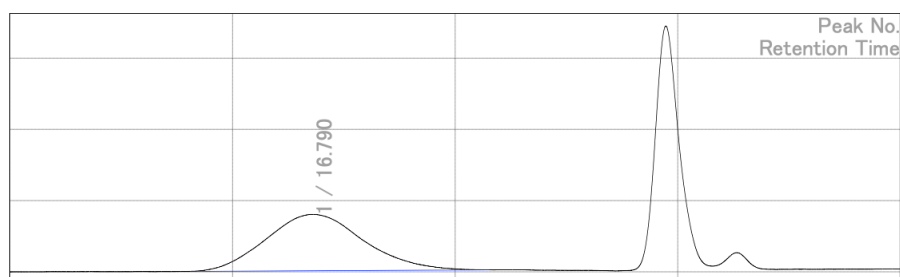

## Result of Calculation (RI) (RI)

Peak 1 Base Peak

|             | [min]  | [mV]   | [mol]        | Mn      | 109,800 |
|-------------|--------|--------|--------------|---------|---------|
| Peak Start  | 14.043 | 0.157  | 2,296,284    | Mw      | 263,261 |
| Peak Top    | 16.790 | 16.167 | 202,441      | Mz      | 487,633 |
| Peak End    | 20.760 | 0.557  | 3,263        | Mz+1    | 743,986 |
|             |        |        |              | Mv      | 263,261 |
| Height [mV] |        |        | 15.846       | Mp      | 202,441 |
| Area [mV*s] |        |        | 2409.115     | Mz/Mw   | 1.852   |
| Area% [%]   |        |        | 100.000      | Mw/Mn   | 2.398   |
| [eta]       |        |        | 263261.44356 | Mz+1/Mw | 2.826   |

**Supplementary Figure 57.** SEC chart of polymer obtained in Table 1, entry 15.  $M_n$  (PS) = 109,800 was corrected to  $M_n$  (PE) = 47,000 by universal calibration.

# Chromatography Report

|                 |                   |                              |                              |
|-----------------|-------------------|------------------------------|------------------------------|
| Title           |                   | Measurement Date & Time      | 2021/07/13 18:35:10          |
| Sample Name     | ts-1-105-1        | Calculation Date & Time      | 2021/07/13 19:11:05          |
| Database Name   | 2021-07-13.chd    | Acquisition Time [min] [min] | 10.000 – 30.000              |
| Saved File Name | RSLT0872          | Sampling Pitch [ms] [ms]     | 100                          |
| Method Data     | meth8509_standard | Vial Number                  | 5                            |
| Calc. Channel   | RI EXT            | Calculation Method           | Molecular Weight Column test |

RI

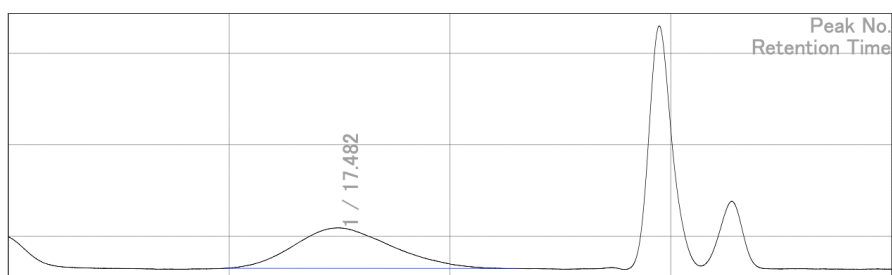

## Result of Calculation (RI) (RI)

Peak 1 Base Peak

|             | [min]  | [mV]   | [mol]        | Mn      | 51,101  |
|-------------|--------|--------|--------------|---------|---------|
| Peak Start  | 14.877 | -7.018 | 1,111,943    | Mw      | 135,232 |
| Peak Top    | 17.482 | 1.837  | 108,711      | Mz      | 255,266 |
| Peak End    | 21.543 | -7.040 | 926          | Mz+1    | 390,564 |
|             |        |        |              | Mv      | 135,232 |
| Height [mV] |        |        | 8.864        | Mp      | 114,427 |
| Area [mV*s] |        |        | 1372.141     | Mz/Mw   | 1.888   |
| Area% [%]   |        |        | 100.000      | Mw/Mn   | 2.646   |
| [eta]       |        |        | 135231.84317 | Mz+1/Mw | 2.888   |

**Supplementary Figure 58.** SEC chart of the polymer obtained in Table 1, entry 12 after UV irradiation.  $M_n$  (PS) = 51,101 was corrected to  $M_n$  (PE) = 22,000 by universal calibration.

# Chromatography Report

|                 |                   |                              |                              |
|-----------------|-------------------|------------------------------|------------------------------|
| Title           |                   | Measurement Date & Time      | 2021/07/13 19:05:11          |
| Sample Name     | ts-1-105-2        | Calculation Date & Time      | 2021/07/13 19:14:06          |
| Database Name   | 2021-07-13.chd    | Acquisition Time [min] [min] | 10.000 – 30.000              |
| Saved File Name | RSLT0873          | Sampling Pitch [ms] [ms]     | 100                          |
| Method Data     | meth8509_standard | Vial Number                  | 6                            |
| Calc. Channel   | RI EXT            | Calculation Method           | Molecular Weight Column test |

RI

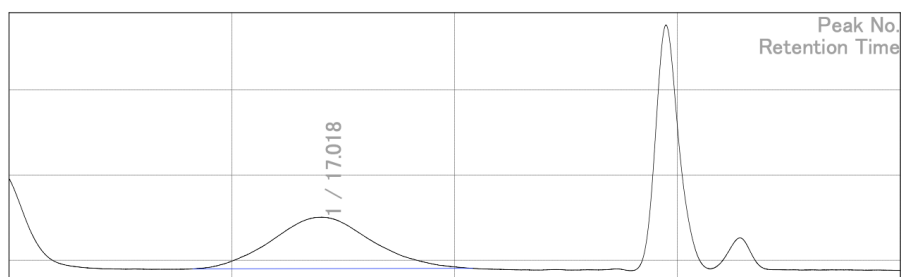

## Result of Calculation (RI) (RI)

Peak 1 Base Peak

|             | [min]  | [mV]    | [mol]        | Mn      | 96,329  |
|-------------|--------|---------|--------------|---------|---------|
| Peak Start  | 14.118 | -22.001 | 2,153,247    | Mw      | 235,968 |
| Peak Top    | 17.018 | -9.859  | 164,989      | Mz      | 464,371 |
| Peak End    | 20.417 | -21.878 | 5,219        | Mz+1    | 735,207 |
|             |        |         |              | Mv      | 235,968 |
| Height [mV] |        |         | 12.085       | Mp      | 164,990 |
| Area [mV*s] |        |         | 1881.649     | Mz/Mw   | 1.968   |
| Area% [%]   |        |         | 100.000      | Mw/Mn   | 2.450   |
| [eta]       |        |         | 235968.19697 | Mz+1/Mw | 3.116   |

**Supplementary Figure 59.** SEC chart of the polymer in Table 1, entry 15 after UV irradiation.  $M_n$  (PS) = 96329 was corrected to  $M_n$  (PE) = 41,000 by universal calibration.

## References

- 1 Rulke, R. E. *et al.* NMR study on the coordination behavior of dissymmetric terdentate trinitrogen ligands on methylpalladium(II) compounds. *Inor. Chem.* **32**, 5769-5778, (1993).
- 2 Ota, Y., Ito, S., Kuroda, J.-i., Okumura, Y. & Nozaki, K. Quantification of the Steric Influence of Alkylphosphine–Sulfonate Ligands on Polymerization, Leading to High-Molecular-Weight Copolymers of Ethylene and Polar Monomers. *J. Am. Chem. Soc.* **136**, 11898-11901, (2014).
- 3 Nakano, R. & Nozaki, K. Copolymerization of Propylene and Polar Monomers Using Pd/IzQO Catalysts. *J. Am. Chem. Soc.* **137**, 10934-10937, (2015).
- 4 Carrow, B. P. & Nozaki, K. Synthesis of Functional Polyolefins Using Cationic Bisphosphine Monoxide–Palladium Complexes. *J. Am. Chem. Soc.* **134**, 8802-8805, (2012).
- 5 Dolomanov, O. V., Bourhis, L. J., Gildea, R. J., Howard, J. A. K. & Puschmann, H. OLEX2: a complete structure solution, refinement and analysis program. *J. Appl. Crystallogr.* **42**, 339-341, (2009).
- 6 Sheldrick, G. SHELXT - Integrated space-group and crystal-structure determination. *Acta Crystallogr. A* **71**, 3-8, (2015).
- 7 Sheldrick, G. M. Crystal structure refinement with SHELXL. *Acta Crystallogr. C* **71**, 3-8, (2015).
- 8 Connor, J. A. *et al.* Enthalpy of formation of acyl-, alkyl- and hydridopentacarbonyl-manganese complexes. The enthalpy contributions of manganese-hydrogen and manganese-carbon bonds in these molecules. Thermochemical aspects of models in Fischer-Tropsch reactions. *Organometallics* **1**, 1166-1174, (1982).
- 9 Goodman, J. L., Peters, K. S. & Vaida, V. The determination of the manganese-manganese bond strength in  $\text{Mn}_2(\text{CO})_{10}$  using pulsed time-resolved photoacoustic calorimetry. *Organometallics* **5**, 815-816, (1986).
- 10 Hughes, A. K. & Wade, K. Metal–metal and metal–ligand bond strengths in metal carbonyl clusters. *Coord. Chem. Rev.* **197**, 191-229, (2000).
